# Supplementary material for: Polyhydroxylated homoazepanes and 1-deoxy-homonojirimycin analogues: synthesis and glycosidase inhibition study
Source: Royal Society of Chemistry journal article supplement (doi:10.1039/b609000a), 2006-01-01
Supplement: b609000a.pdf [file b609000a.pdf]

## Supporting Information

### Polyhydroxylated Homoazepanes and 1-Deoxy-homonojirimycin Analogues:

#### Synthesis and Glycosidase Inhibition Study

Shankar D. Markad,<sup>a</sup> Narayan S. Karanjule,<sup>a</sup> Tarun Sharma,<sup>b</sup> Sushma G. Sabharwal,<sup>b</sup> and

Dilip D. Dhavale<sup>\*a</sup>

<sup>a</sup>*Garware Research Centre, Department of Chemistry, University of Pune, Pune – 411 007, INDIA*

<sup>b</sup>*Division of Biochemistry, Department of Chemistry, University of Pune, Pune – 411 007, INDIA*

*ddd@chem.unipune.ernet.in*

|                                                                                      | Page  |
|--------------------------------------------------------------------------------------|-------|
| Experimental procedures for <b>11</b> , <b>12a,b</b> , <b>13a,b</b> and <b>14a,b</b> | S1-S5 |
| <sup>1</sup> H NMR spectrum of compound <b>11</b>                                    | S6    |
| <sup>13</sup> C NMR spectrum of compound <b>11</b>                                   | S7    |
| <sup>1</sup> H NMR spectrum of compound <b>12a</b>                                   | S8    |
| <sup>13</sup> C NMR spectrum of compound <b>12a</b>                                  | S9    |
| <sup>1</sup> H NMR spectrum of compound <b>12b</b>                                   | S10   |
| <sup>13</sup> C NMR spectrum of compound <b>12b</b>                                  | S11   |
| <sup>1</sup> H NMR spectrum of compound <b>13a</b>                                   | S12   |
| <sup>13</sup> C NMR spectrum of compound <b>13a</b>                                  | S13   |
| <sup>1</sup> H NMR spectrum of compound <b>13b</b>                                   | S14   |
| <sup>13</sup> C NMR spectrum of compound <b>13b</b>                                  | S15   |
| <sup>1</sup> H NMR spectrum of compound <b>14a</b>                                   | S16   |
| <sup>13</sup> C NMR spectrum of compound <b>14a</b>                                  | S17   |
| <sup>1</sup> H NMR spectrum of compound <b>14b</b>                                   | S18   |
| <sup>13</sup> C NMR spectrum of compound <b>14b</b>                                  | S19   |

|                                                        |     |
|--------------------------------------------------------|-----|
| <sup>1</sup> H NMR spectrum of compound <b>4a</b>      | S20 |
| <sup>13</sup> C NMR spectrum of compound <b>4a</b>     | S21 |
| <sup>1</sup> H NMR spectrum of compound <b>4b</b>      | S22 |
| <sup>13</sup> C NMR spectrum of compound <b>4b</b>     | S23 |
| <sup>1</sup> H NMR spectrum of compound <b>4a.HCl</b>  | S24 |
| <sup>13</sup> C NMR spectrum of compound <b>4a.HCl</b> | S25 |
| <sup>1</sup> H NMR spectrum of compound <b>4b.HCl</b>  | S26 |
| <sup>13</sup> C NMR spectrum of compound <b>4b.HCl</b> | S27 |
| <sup>1</sup> H NMR spectrum of compound <b>15a</b>     | S28 |
| <sup>13</sup> C NMR spectrum of compound <b>15a</b>    | S29 |
| <sup>1</sup> H NMR spectrum of compound <b>15b</b>     | S30 |
| <sup>13</sup> C NMR spectrum of compound <b>15b</b>    | S31 |
| <sup>1</sup> H NMR spectrum of compound <b>3a.HCl</b>  | S32 |
| <sup>13</sup> C NMR spectrum of compound <b>3a.HCl</b> | S33 |
| <sup>1</sup> H NMR spectrum of compound <b>3b.HCl</b>  | S34 |
| <sup>13</sup> C NMR spectrum of compound <b>3b.HCl</b> | S35 |
| <sup>1</sup> H NMR spectrum of compound <b>3a</b>      | S36 |
| <sup>13</sup> C NMR spectrum of compound <b>3a</b>     | S37 |
| <sup>1</sup> H NMR spectrum of compound <b>3b</b>      | S38 |
| <sup>13</sup> C NMR spectrum of compound <b>3b</b>     | S39 |

**3,9-Di-*O*-benzyl-1,2-*O*-isopropylidene-5,6,7,8-tetradecoxy- $\alpha$ -D-xylo-nona-5-eno-1,4-furanose**

**(11).** To a cooled solution of sodium hydride (0.43 g, 10.78 mmol) in THF (2 cm<sup>3</sup>) was added alcohol **10** (3.0 g, 8.98 mmol) in THF (30 cm<sup>3</sup>) and stirred for half an hour. Benzyl bromide (1.28 cm<sup>3</sup>, 10.78 mmol) and tetra *n*-butyl ammonium iodide (10 mg) were added and the resulting reaction mixture was allowed to warm at room temperature and stirred for 6 h. The reaction mixture was quenched by adding saturated ammonium chloride (10 cm<sup>3</sup>) and THF was removed under reduced pressure and the residue obtained was extracted with chloroform (3 x 30 cm<sup>3</sup>). Usual workup and chromatographic purification (*n*-hexane/ethyl acetate = 9.5/0.5) afforded **11** (3.6 g, 95%) as a thick liquid (Found: C, 73.54; H, 7.63. Calcd for C<sub>26</sub>H<sub>32</sub>O<sub>5</sub>: C, 73.56; H, 7.60); *R*<sub>f</sub> 0.56 (10% ethyl acetate-*n*-hexane); [ $\alpha$ ]<sub>D</sub><sup>25</sup> -43.2 (*c* 1.25 in CHCl<sub>3</sub>);  $\nu_{\max}$ (Neat)/cm<sup>-1</sup> 1603, 1452, 1375, 1310 and 1215;  $\delta_{\text{H}}$  (300 MHz; CDCl<sub>3</sub>; Me<sub>4</sub>Si) 1.32 (3H, s, CH<sub>3</sub>), 1.50 (3H, s, CH<sub>3</sub>), 1.73 (2H, quintet, *J* 6.6 Hz, *H*6a,b), 2.20 (2H, q, *J* 6.6 Hz, *H*7a,b), 3.49 (2H, t, *J* 6.6 Hz, *H*9a,b), 3.81 (1H, d, *J* 3.3 Hz, *H*3), 4.48 (2H, s, OCH<sub>2</sub>Ph), 4.53 (1H, d, *J* 12.3 Hz, OCH<sub>2</sub>Ph), 4.58 (1H, dd, *J* 7.5 and 3.3 Hz, *H*4), 4.61 (1H, d, *J* 3.6 Hz, *H*2), 4.64 (1H, d, *J* 12.3 Hz, OCH<sub>2</sub>Ph), 5.69 (1H, dd, *J* 15.6 and 7.5 Hz, *H*5), 5.86 (1H, dt, *J* 15.6 and 6.6 Hz, *H*6), 5.93 (1H, d, *J* 3.6 Hz, *H*1), 7.25–7.36 (10H, m, Ar*H*'s);  $\delta_{\text{C}}$  (75 MHz; CDCl<sub>3</sub>; Me<sub>4</sub>Si) 25.8, 26.4 (2 x CH<sub>3</sub>), 28.6, 28.7 (C7/C8), 69.1 (C9), 71.4, 72.3 (2 x OCH<sub>2</sub>Ph), 80.8, 82.4, 83.0 (C2/C3/C4), 104.2 (C1), 110.7 (OCO), 123.8 (C6), 126.9 (strong), 127.0 (strong), 127.1, 127.2, 127.7 (strong), 127.8 (strong), 134.9 (C5), 137.1, 138.0 (ArC's).

**3,9-Di-*O*-benzyl-1,2-*O*-isopropylidene-7,8-dideoxy-5,6-oxirano- $\beta$ -L-glycero-D-glucio-nona-1,4-furanose (12a) and 3,9-di-*O*-benzyl-1,2-*O*-isopropylidene-7,8-dideoxy-5,6-oxirano- $\alpha$ -D-glycero-L-ido-nona-1,4-furanose (12b).** To a solution of the olefin **11** (3.6 g, 8.49 mmol) in CH<sub>2</sub>Cl<sub>2</sub> (60 cm<sup>3</sup>) was added *m*-chloroperbenzoic acid (2.2 g, 12.74 mmol) at 0 °C and the resulting reaction mixture was allowed to warm at room temperature and stirred for 24 h. The reaction mixture was diluted by adding water (10 cm<sup>3</sup>) and the aqueous phase was extracted with CH<sub>2</sub>Cl<sub>2</sub> (3 x 30 cm<sup>3</sup>). The combined organic phase was washed

with 2N NaOH (10 cm<sup>3</sup>) and worked up to afford a diastereomeric mixture of epoxides. Purification by column chromatography and first elution with (*n*-hexane/ethyl acetate = 9.6/0.4) gave **12a** (2.4 g, 64%) as a thick liquid (Found: C, 70.91; H, 7.29. Calcd for C<sub>26</sub>H<sub>32</sub>O<sub>6</sub>: C, 70.89; H, 7.32); R<sub>f</sub> 0.56 (20% ethyl acetate-*n*-hexane); [α]<sub>D</sub><sup>25</sup> – 41.0 (*c* 2.0 in CHCl<sub>3</sub>); ν<sub>max</sub>(Neat)/cm<sup>–1</sup> 1454, 1375, 1217 and 1082; δ<sub>H</sub> (300 MHz; CDCl<sub>3</sub>; Me<sub>4</sub>Si) 1.31 (3H, s, CH<sub>3</sub>), 1.45 (3H, s, CH<sub>3</sub>), 1.66–1.79 (4H, m, H7a,b and H8a,b), 3.00–3.03 (1H, m, H6), 3.07 (1H, dd, *J* 7.2 and 2.1 Hz, H5), 3.45 (2H, m, H9a,b), 3.78 (1H, dd, *J* 7.2 and 3.0 Hz, H4), 4.04 (1H, d, *J* 3.0 Hz, H3), 4.49 (2H, s, OCH<sub>2</sub>Ph), 4.61 (1H, d, *J* 3.6 Hz, H2), 4.67 (2H, ABq, *J* 12.0 Hz, OCH<sub>2</sub>Ph), 5.92 (1H, d, *J* 3.6 Hz, H1), 7.26–7.36 (10H, m, ArH's); δ<sub>C</sub> (75 MHz; CDCl<sub>3</sub>; Me<sub>4</sub>Si) 26.1, 26.3 (2 x CH<sub>3</sub>), 26.8, 28.5 (C7/C8), 54.1, 58.5 (C5/C6), 69.5 (C9), 72.3, 72.8 (2 x OCH<sub>2</sub>Ph), 81.3, 81.9, 82.6 (C2/C3/C4), 105.2 (C1), 111.7 (OCO), 127.4, 127.5, 127.51 (strong), 127.8 (strong), 128.2 (strong), 128.4 (strong), 137.2, 138.3 (ArC's). Further elution with (*n*-hexane/ethyl acetate = 9.5/0.5) afforded **12b** (1.2 g, 32%) as a thick liquid (Found: C, 70.93; H, 7.36. Calcd for C<sub>26</sub>H<sub>32</sub>O<sub>6</sub>: C, 70.89; H, 7.32); R<sub>f</sub> 0.41 (20% ethyl acetate-*n*-hexane); [α]<sub>D</sub><sup>25</sup> – 20.0 (*c* 0.5 in CHCl<sub>3</sub>); ν<sub>max</sub>(Neat)/cm<sup>–1</sup> 1454, 1377, 1215, 1163 and 1024; δ<sub>H</sub> (300 MHz; CDCl<sub>3</sub>; Me<sub>4</sub>Si) 1.32 (3H, s, CH<sub>3</sub>), 1.46 (3H, s, CH<sub>3</sub>), 1.66–1.81 (4H, m, H7a,b and H8a,b), 2.84 (1H, ddd, *J* 5.1, 3.6 and 2.1, H6), 3.06 (1H, dd, *J* 6.0 and 2.1 Hz, H5), 3.44–3.56 (2H, m, H9a,b), 3.85 (1H, dd, *J* 6.0 and 3.6 Hz, H4), 3.95 (1H, d, *J* 3.6 Hz, H3), 4.48 (2H, s, OCH<sub>2</sub>Ph), 4.51 (1H, d, *J* 12.3 Hz, OCH<sub>2</sub>Ph), 4.62 (1, d, *J* 3.9 Hz, H2), 4.71 (1H, d, *J* 12.3 Hz, OCH<sub>2</sub>Ph), 5.98 (1H, d, *J* 3.9 Hz, H1), 7.27–7.36 (10H, m, ArH's); δ<sub>C</sub> (75 MHz; CDCl<sub>3</sub>; Me<sub>4</sub>Si) 25.8, 26.0 (2 x CH<sub>3</sub>), 26.5, 28.1 (C7/C8), 54.1, 55.6 (C5/C6), 69.2 (C9), 71.4, 72.4 (2 x OCH<sub>2</sub>Ph), 81.2, 81.8, 82.4 (C2/C3/C4), 104.9 (C1), 111.2 (OCO), 127.0, 127.1 (strong), 127.2 (strong), 127.5, 127.8 (strong), 128.0 (strong), 136.8, 138.0 (ArC's).

**6-Azido-3,9-di-*O*-benzyl-1,2-*O*-isopropylidene-6,7,8-trideoxy-α-D-glycero-D-glucopyranose (13a).** To a solution of epoxide **12a** (1.0 g, 2.27 mmol) in DMF (10 cm<sup>3</sup>) was added sodium

azide (0.89 g, 13.64 mmol) and lithium chloride (0.57 g, 13.64 mmol) and the resulting reaction mixture was heated to 100 °C for 8 h. The reaction mixture was poured in an ice-water (50 cm<sup>3</sup>) and extracted with ethyl acetate (3 x 20 cm<sup>3</sup>). Purification by column chromatography (*n*-hexane/ethyl acetate = 9/1) gave **13a** (1.0 g, 91%) as a thick liquid (Found: C, 64.60; H, 6.87. Calcd for C<sub>26</sub>H<sub>33</sub>N<sub>3</sub>O<sub>6</sub>: C, 64.58; H, 6.88); *R*<sub>f</sub> 0.59 (20% ethyl acetate-*n*-hexane); [ $\alpha$ ]<sub>D</sub><sup>25</sup> – 28.4 (*c* 2.25 in CHCl<sub>3</sub>);  $\nu_{\text{max}}$ (Neat)/cm<sup>–1</sup> 3200–3600 (broad band), 2104, 1454, 1375 and 1217;  $\delta_{\text{H}}$  (300 MHz; CDCl<sub>3</sub>; Me<sub>4</sub>Si) 1.32 (3H, s, CH<sub>3</sub>), 1.47 (3H, s, CH<sub>3</sub>), 1.62–1.88 (4H, m, *H*7a,b and *H*8a,b), 2.66 (1H, d, *J* 6.0 Hz, exchanges with D<sub>2</sub>O, OH), 3.42–3.58 (3H, m, *H*6 and *H*9a,b), 4.09 (1H, dd, *J* 6.9 and 4.5 Hz, *H*5), 4.13 (1H, d, *J* 3.0 Hz, *H*3), 4.17 (1H, dd, *J* 6.9 and 3.0 Hz, *H*4), 4.51 (2H, s, OCH<sub>2</sub>Ph), 4.52 (1H, d, *J* 11.4, Hz, OCH<sub>2</sub>Ph), 4.63 (1H, d, *J* 3.6 Hz, *H*2), 4.73 (1H, d, *J* 11.4 Hz, OCH<sub>2</sub>Ph), 5.96 (1H, d, *J* 3.6 Hz, *H*1), 7.27–7.40 (10H, m, Ar*H*'s);  $\delta_{\text{C}}$  (75 MHz; CDCl<sub>3</sub>; Me<sub>4</sub>Si) 26.0, 26.3 (2 x CH<sub>3</sub>), 26.7, 26.9 (*C*7/*C*8), 65.0, 69.7 (*C*6/*C*9), 71.4, 72.0 (2 x OCH<sub>2</sub>Ph), 72.9 (*C*5), 78.3, 81.7, 82.4 (*C*2/*C*3/*C*4), 104.9 (*C*1), 111.8 (OCO), 127.4, 127.5 (strong), 128.0 (strong), 128.2 (strong), 128.4, 128.7 (strong), 136.5, 138.3 (Ar*C*'s).

**6-Azido-3,9-di-*O*-benzyl-1,2-*O*-isopropylidene-6,7,8-trideoxy- $\beta$ -L-glycero-L-ido-nona-1,4-furanose (**13b**).** The epoxide **12b** (1.0 g, 2.27 mmol) was reacted with sodium azide (0.89 g, 13.64 mmol) and lithium chloride (0.57 g, 13.64 mmol) as described in the synthesis of **13a** to afford **13b** (1.0 g, 92%) as a thick liquid (Found: C, 64.56; H, 6.91. Calcd for C<sub>26</sub>H<sub>33</sub>N<sub>3</sub>O<sub>6</sub>: C, 64.58; H, 6.88); *R*<sub>f</sub> 0.54 (20% ethyl acetate-*n*-hexane); [ $\alpha$ ]<sub>D</sub><sup>25</sup> – 46.4 (*c* 1.25 in CHCl<sub>3</sub>);  $\nu_{\text{max}}$ (Neat)/cm<sup>–1</sup> 3200–3600 (broad band), 2102, 1454, 1375 and 1078;  $\delta_{\text{H}}$  (300 MHz; CDCl<sub>3</sub>; Me<sub>4</sub>Si) 1.35 (3H, s, CH<sub>3</sub>), 1.51 (3H, s, CH<sub>3</sub>), 1.60–1.75 (2H, m, *H*7a,b), 1.81–1.98 (2H, m, *H*8a,b), 3.4–3.55 (1H, bs, exchanges with D<sub>2</sub>O, OH), 3.46–3.55 (3H, m, *H*6 and *H*9a,b), 3.82 (1H, dd, *J* 7.5 and 3.0 Hz, *H*4), 4.07 (1H, d, *J* 3.0 Hz, *H*3), 4.33 (1H, dd, *J* 7.5 and 3.0 Hz, *H*5), 4.50 (2H, s, OCH<sub>2</sub>Ph), 4.51 (1H, d, *J* 12.0 Hz, OCH<sub>2</sub>Ph), 4.65 (1H, d, *J* 3.6 Hz, *H*2), 4.73 (1H, d, *J* 12.0, Hz, OCH<sub>2</sub>Ph), 6.00 (1H, d, *J* 3.6 Hz, *H*1), 7.28–7.37 (10H, m, Ar*H*'s);  $\delta_{\text{C}}$  (75 MHz; CDCl<sub>3</sub>; Me<sub>4</sub>Si)

26.0, 26.5 (2 x CH<sub>3</sub>), 26.9, 27.0 (C7/C8), 63.4, 69.9 (C9/C6), 71.6, 72.0 (2 x OCH<sub>2</sub>Ph), 72.9 (C5), 78.0, 82.1, 83.8 (C2/C3/C4), 104.7 (C1), 112.1 (OCO), 127.4, 127.5 (strong), 127.8 (strong), 128.2 (strong), 128.3, 128.7 (strong), 136.2, 138.3 (ArC's).

**6-(N-Benzoxycarbonylamino)-6,7,8-trideoxy-1,2-O-isopropylidene-α-D-glycero-D-glucosona-1,4-furanose (14a).** To a solution of **13a** (0.90 g, 1.86 mmol) in methanol (15 cm<sup>3</sup>) was added ammonium formate (0.70 g, 11.18 mmol) and 10% Pd/C (0.30 g) and the resulting reaction mixture was refluxed for an hour. The reaction mixture was filtered through a pad of celite and the filtrate was concentrated to give thick oil. To a cooled solution of amino alcohol (0.50 g, 1.80 mmol) in methanol-water (10 cm<sup>3</sup>, 9:1) was added sodium bicarbonate (0.45 g, 5.42 mmol) and benzyl chloroformate (0.37 g, 2.17 mmol) at 0 °C and the resulting reaction mixture was stirred for 12 h. Methanol was evaporated under reduced pressure and the residue was extracted with chloroform (3 × 20 cm<sup>3</sup>). Usual workup and purification by column chromatography (*n*-hexane/ethyl acetate = 4/6) gave **14a** (0.58 g, 76%) as a white solid (Found: C, 58.41; H, 7.11. Calcd for C<sub>20</sub>H<sub>29</sub>NO<sub>8</sub>: C, 58.38; H, 7.10); R<sub>f</sub> 0.54 (ethyl acetate); [α]<sub>D</sub><sup>25</sup> +6.0 (*c* 1.0 in CHCl<sub>3</sub>); mp 124–126 °C (ethyl acetate); ν<sub>max</sub>(KBr)/cm<sup>-1</sup> 3200–3600 (broad band), 1688, 1533, 1450, 1377, 1256 and 1069; δ<sub>H</sub> (300 MHz; CHCl<sub>3</sub> + D<sub>2</sub>O; Me<sub>4</sub>Si) 1.26 (3H, s, CH<sub>3</sub>), 1.42 (3H, s, CH<sub>3</sub>), 1.45–1.65 (3H, m, H7a,b and H8a), 1.75–1.85 (1H, m, H8b), 3.59 (2H, bt, *J* 4.5 Hz, H9a,b), 3.85 (1H, bt, *J* 4.5 Hz, H6), 3.94 (1H, dd, *J* 7.5 and 4.5 Hz, H5), 4.07 (1H, dd, *J* 7.5 and 2.4 Hz, H4), 4.33 (1H, d, *J* 2.4 Hz, H3), 4.47 (1H, d, *J* 3.6 Hz, H2), 5.06 (2H, s, OCH<sub>2</sub>Ph), 5.90 (1H, d, *J* 3.6, Hz, H1) 7.23–7.28 (5H, m, ArH's); δ<sub>C</sub> (75 MHz; CDCl<sub>3</sub>; Me<sub>4</sub>Si) 26.1, 26.2 (2 x CH<sub>3</sub>), 26.8, 28.5 (C7/C8), 53.8 (C9), 61.7 (C6), 67.0 (C5), 71.7 (OCH<sub>2</sub>Ph), 75.1, 79.7, 84.8 (C2/C3/C3), 104.8 (C1), 111.6 (OCO), 127.9 (strong), 128.1, 128.4 (strong), 136.1 (ArC's), 157.2 (NHCO).

**6-(N-Benzoxycarbonylamino)-6,7,8-trideoxy-1,2-O-isopropylidene-β-L-glycero-L-ido-nona-1,4-furanose (14b).** The reaction of **13b** (0.90 g, 1.86 mmol) with ammonium formate (0.70 g, 11.18 mmol) and 10% Pd/C (0.30 g) in methanol (15 cm<sup>3</sup>) followed by sodium bicarbonate (0.45 g, 5.42 mmol)

and benzyl chloroformate (0.37 g, 2.17 mmol) as described in the synthesis of **14a** afforded **14b** (0.52 g, 68%) as a white solid (Found: C, 58.36; H, 7.12. Calcd for C<sub>20</sub>H<sub>29</sub>NO<sub>8</sub>: C, 58.38; H, 7.10); *R<sub>f</sub>* 0.48 (ethyl acetate);  $[\alpha]_{\text{D}}^{25} - 26.7$  (*c* 0.45 in CHCl<sub>3</sub>); mp 154–156 °C (ethyl acetate);  $\nu_{\text{max.}}(\text{KBr})/\text{cm}^{-1}$  3200–3600 (broad band), 1672, 1533, 1446, 1379, 1331 and 1248;  $\delta_{\text{H}}$  (300 MHz; CHCl<sub>3</sub> + D<sub>2</sub>O; Me<sub>4</sub>Si) 1.31 (3H, s, CH<sub>3</sub>), 1.46 (3H, s, CH<sub>3</sub>), 1.46–1.76 (4H, m, *H*7a,b and *H*8a,b), 3.56–3.72 (2H, m, *H*9a,b), 3.84–3.96 (1H, m, *H*6), 4.09 (1H, t, *J* 3.9 Hz, *H*5), 4.15 (1H, dd, *J* 3.9 and 2.7 Hz, *H*4), 4.27 (1H, d, *J* 2.7 Hz, *H*3), 4.49 (1H, d, *J* 3.6 Hz, *H*2), 5.08 (2H, ABq, *J* 12.3 Hz, OCH<sub>2</sub>Ph), 5.94 (1H, d, *J* 3.6 Hz, *H*1) 7.25–7.35 (5H, m, Ar*H*'s);  $\delta_{\text{C}}$  (75 MHz; CDCl<sub>3</sub>; Me<sub>4</sub>Si) 26.3, 26.9 (strong), 28.6 (2 x CH<sub>3</sub> and C7/C8), 53.9, 62.0 (C6/C9), 67.1 (C5), 72.0 (OCH<sub>2</sub>Ph), 76.3, 78.5, 85.0 (C2/C3/C4), 104.8 (C1), 111.8 (OCO), 128.0 (strong), 128.1, 128.4 (strong), 136.0 (ArC's), 157.2 (NHCO).

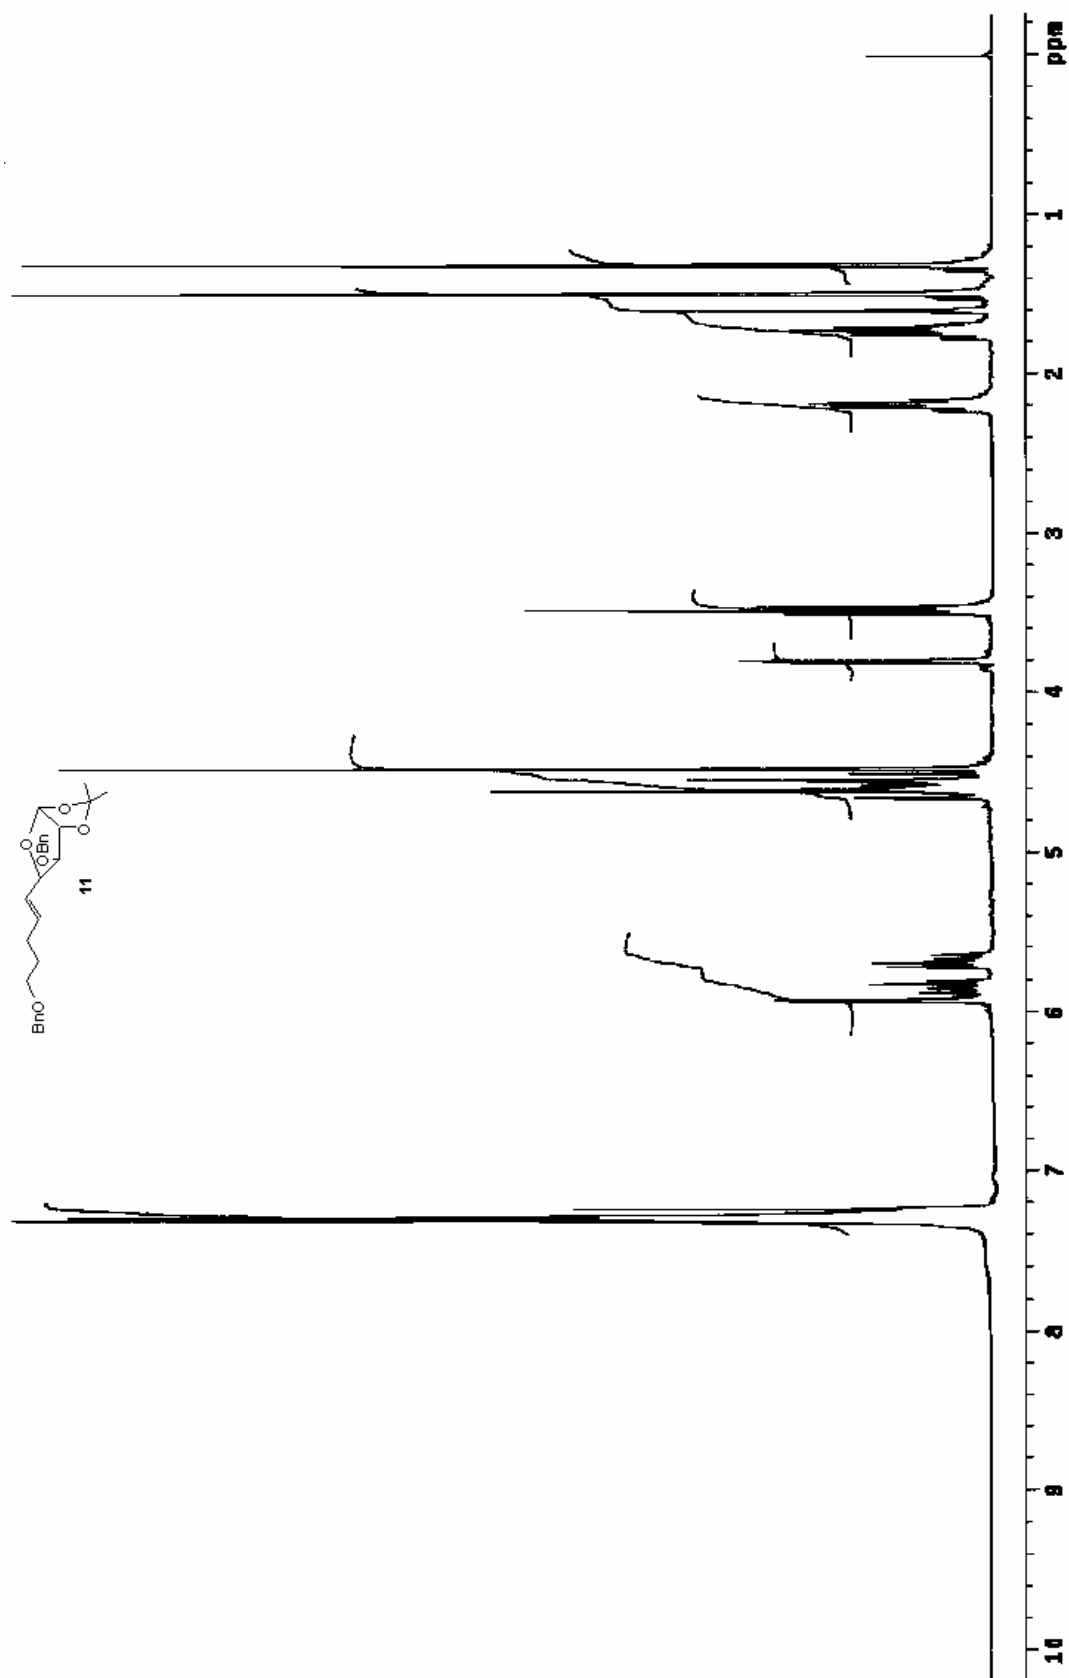

Figure 1:  $^1\text{H}$  NMR (300 MHz,  $\text{CDCl}_3$ ) spectrum of compound 11



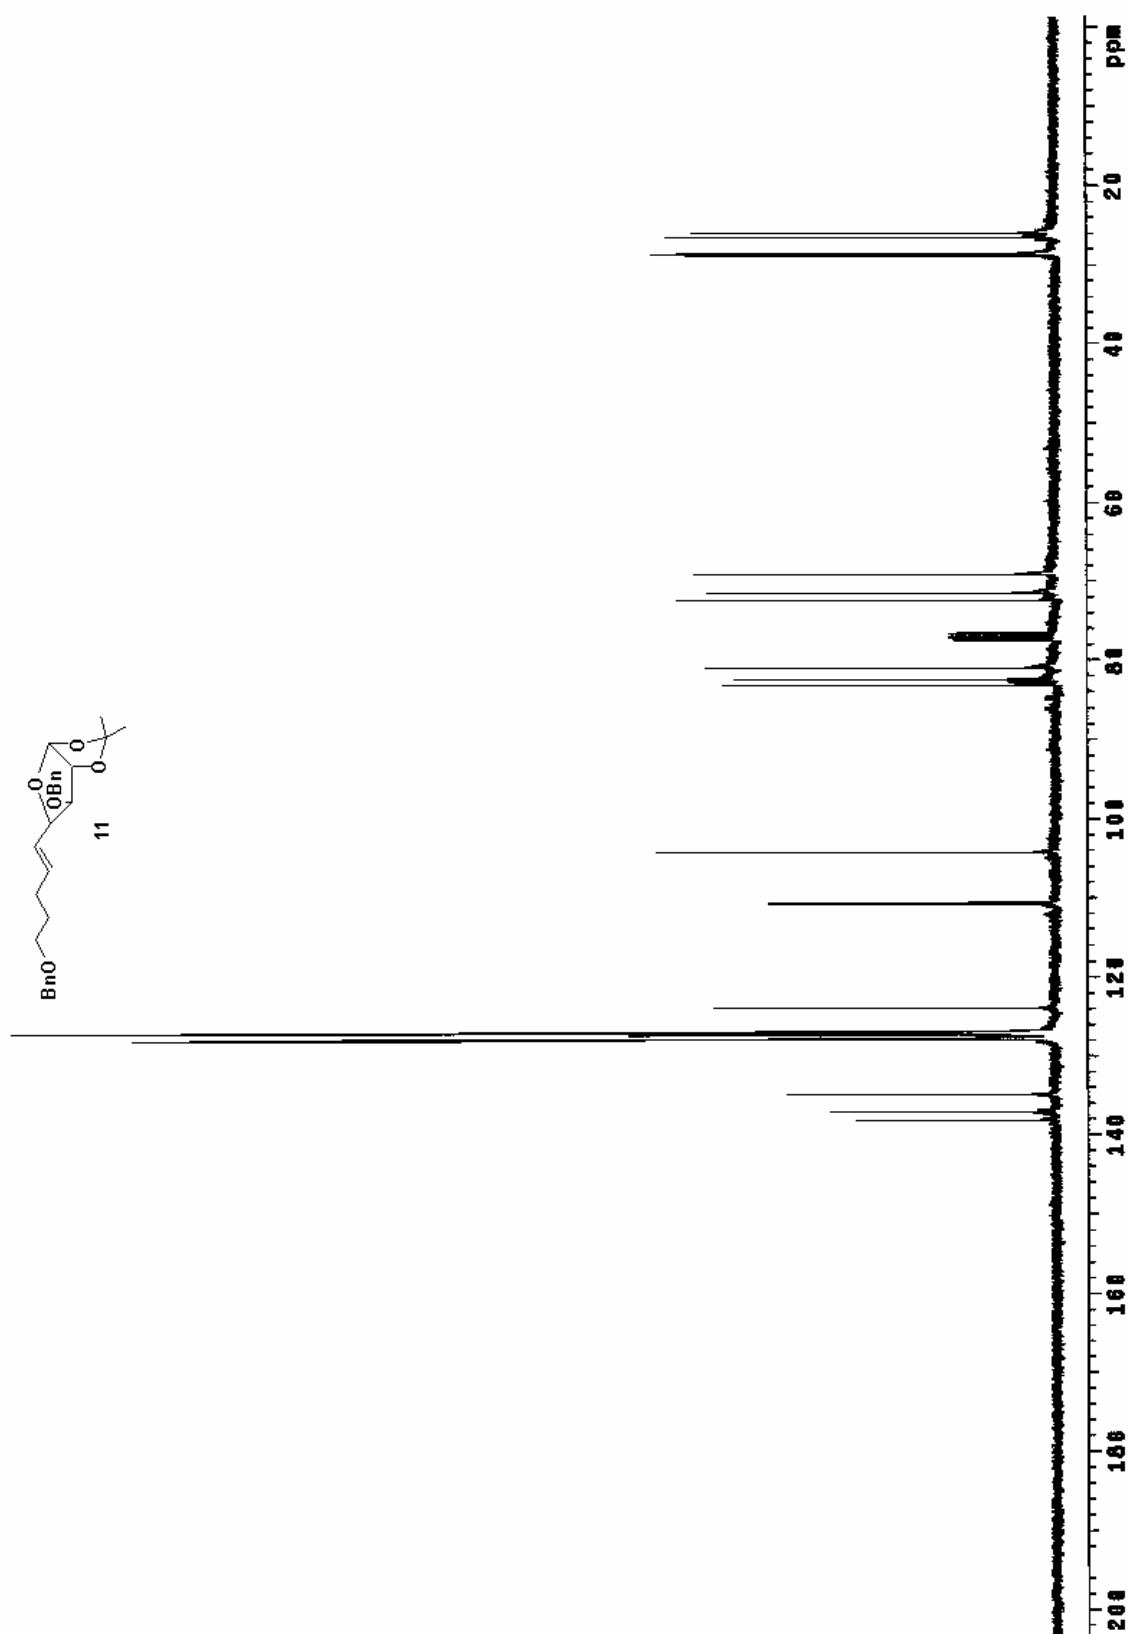

Figure 2: <sup>13</sup>C NMR (75 MHz, CDCl<sub>3</sub>) spectrum of compound 11

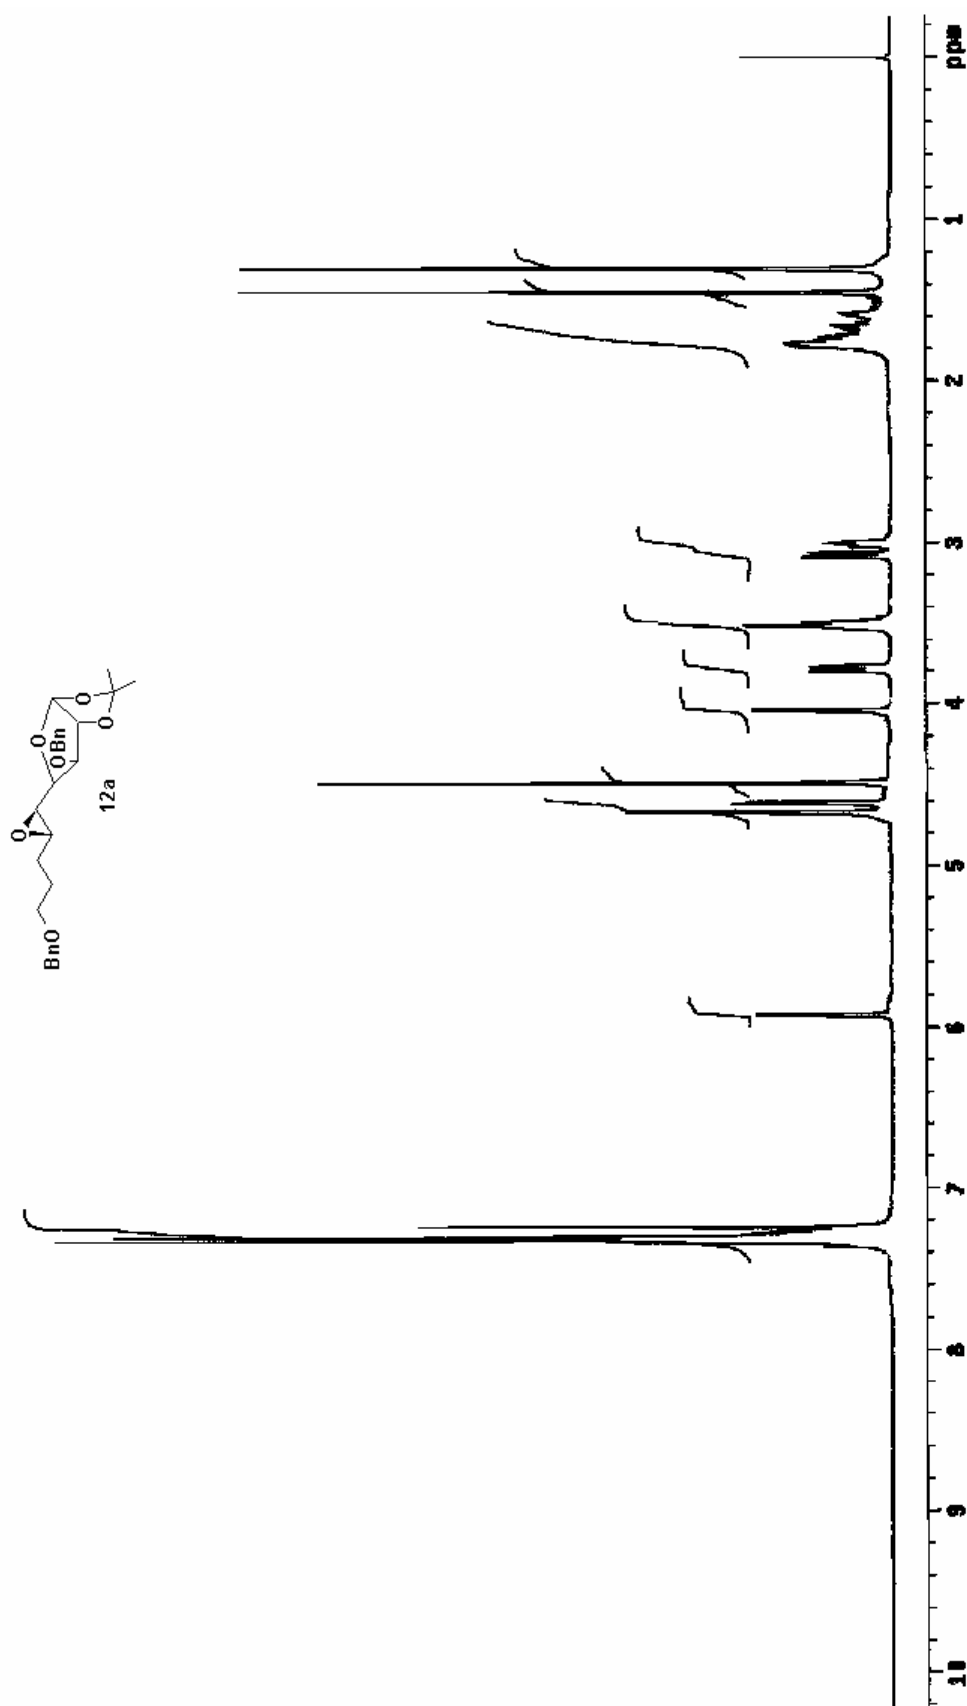

Figure 3: <sup>1</sup>H NMR (300 MHz, CDCl<sub>3</sub>) spectrum of compound 12a

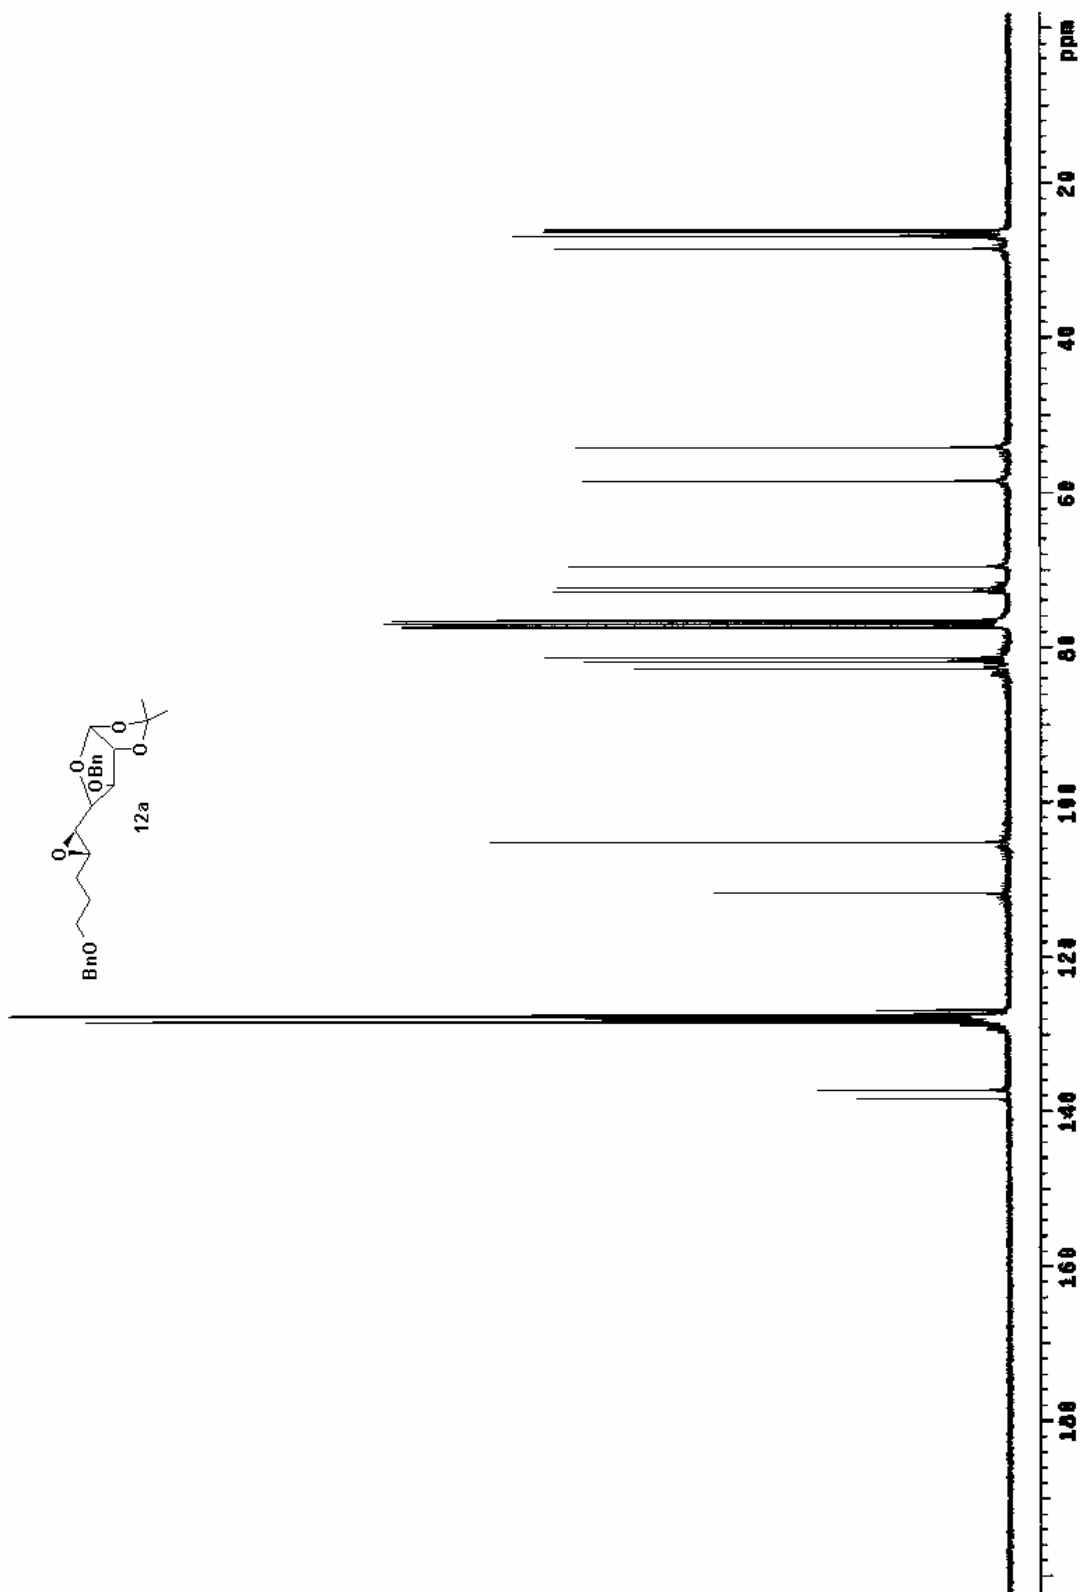

**Figure 4:**  $^{13}\text{C}$  NMR (75 MHz,  $\text{CDCl}_3$ ) spectrum of compound 12a

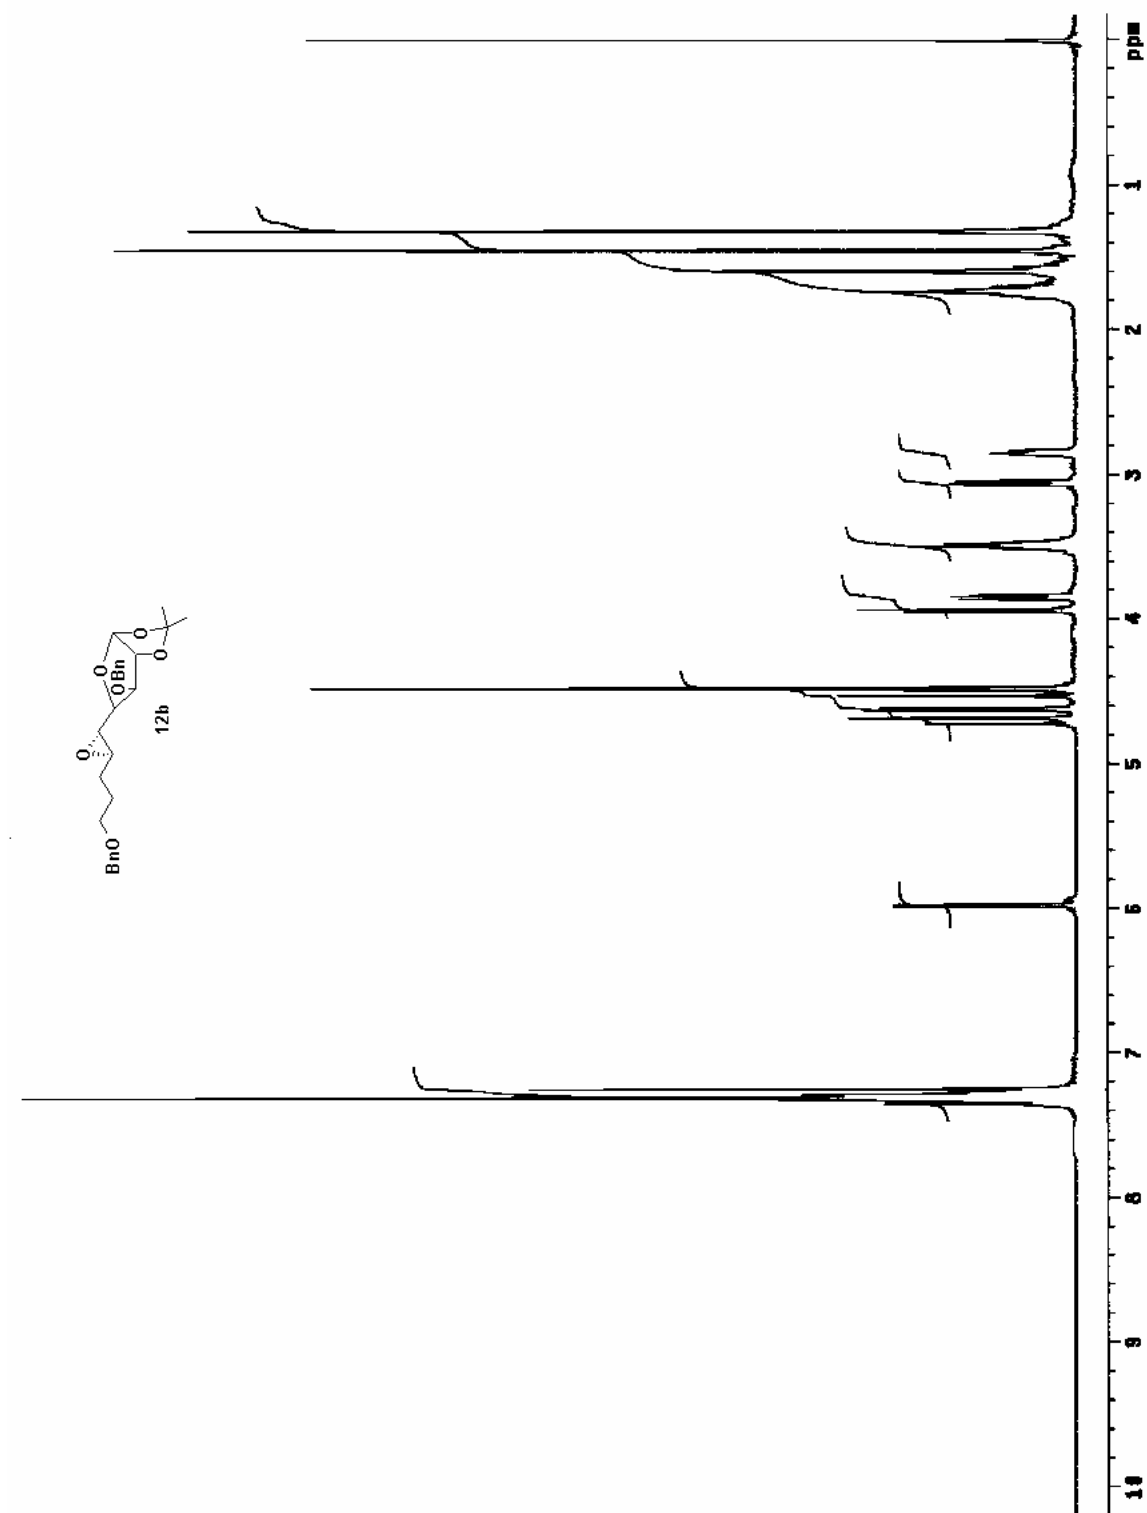

Figure 5:  $^1\text{H}$  NMR (300 MHz,  $\text{CDCl}_3$ ) spectrum of compound 12b

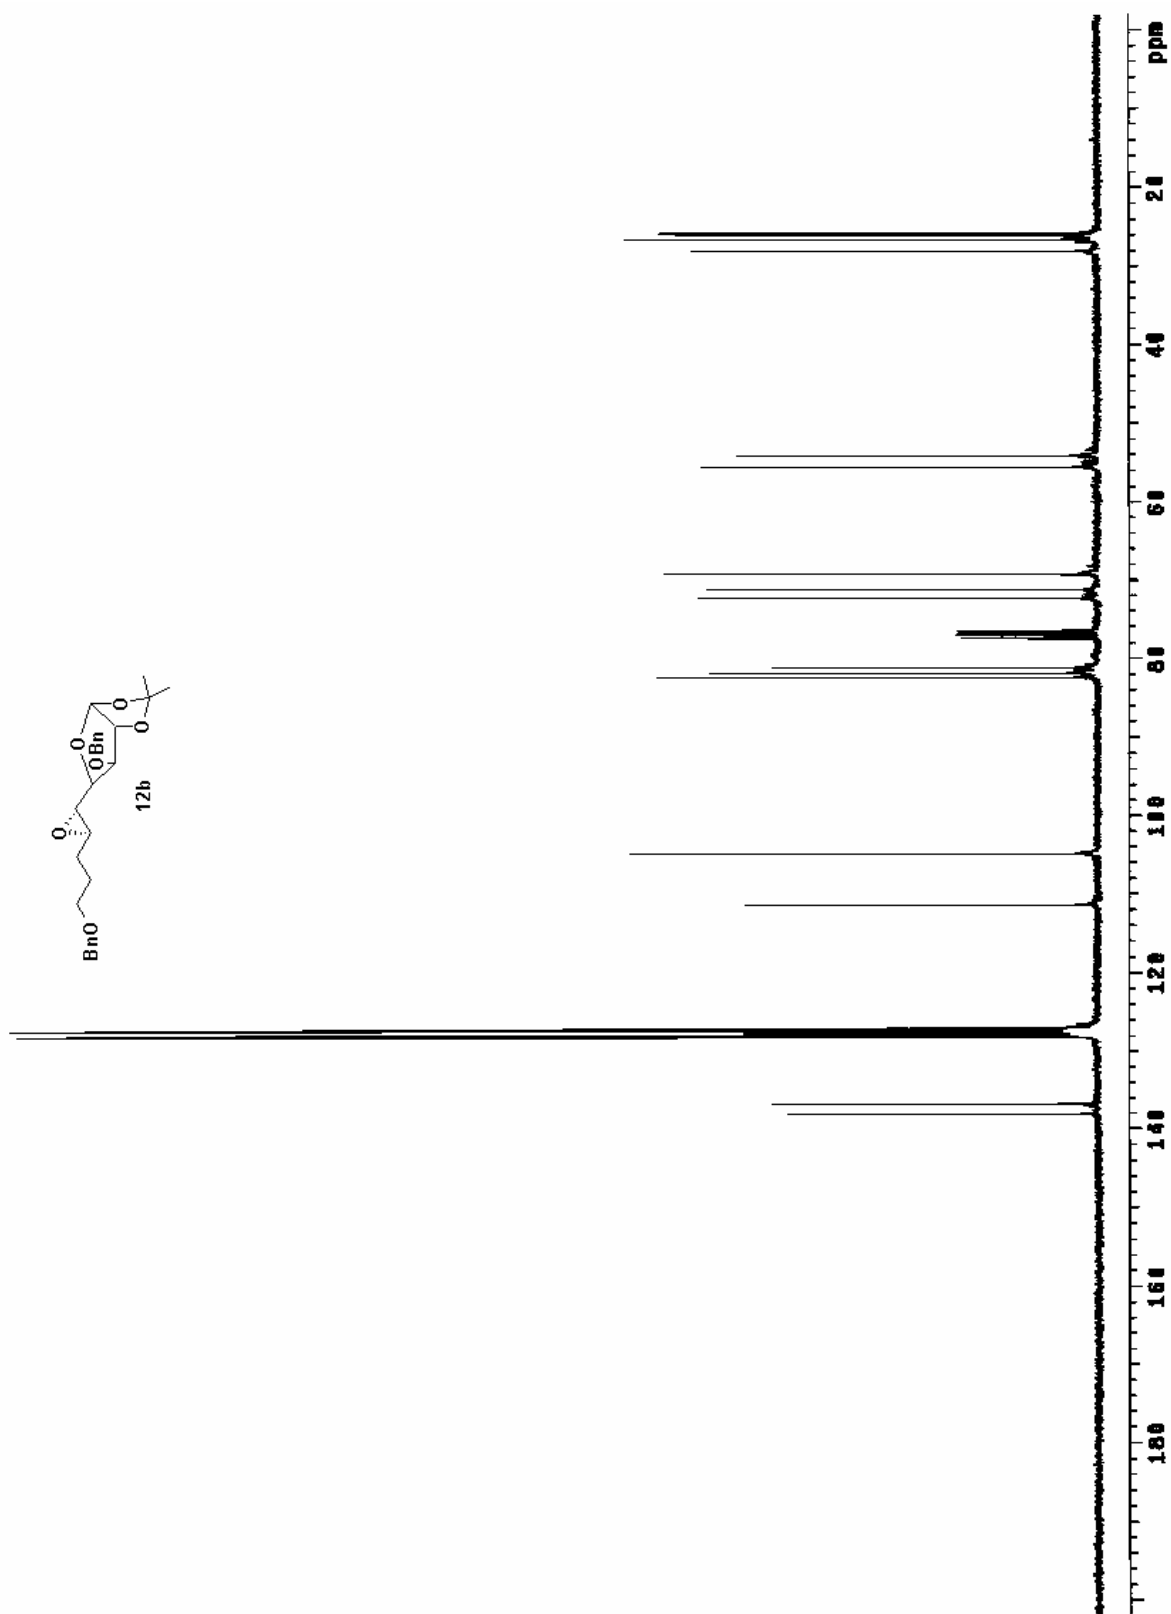

Figure 6:  $^{13}\text{C}$  NMR (75 MHz,  $\text{CDCl}_3$ ) spectrum of compound 12b

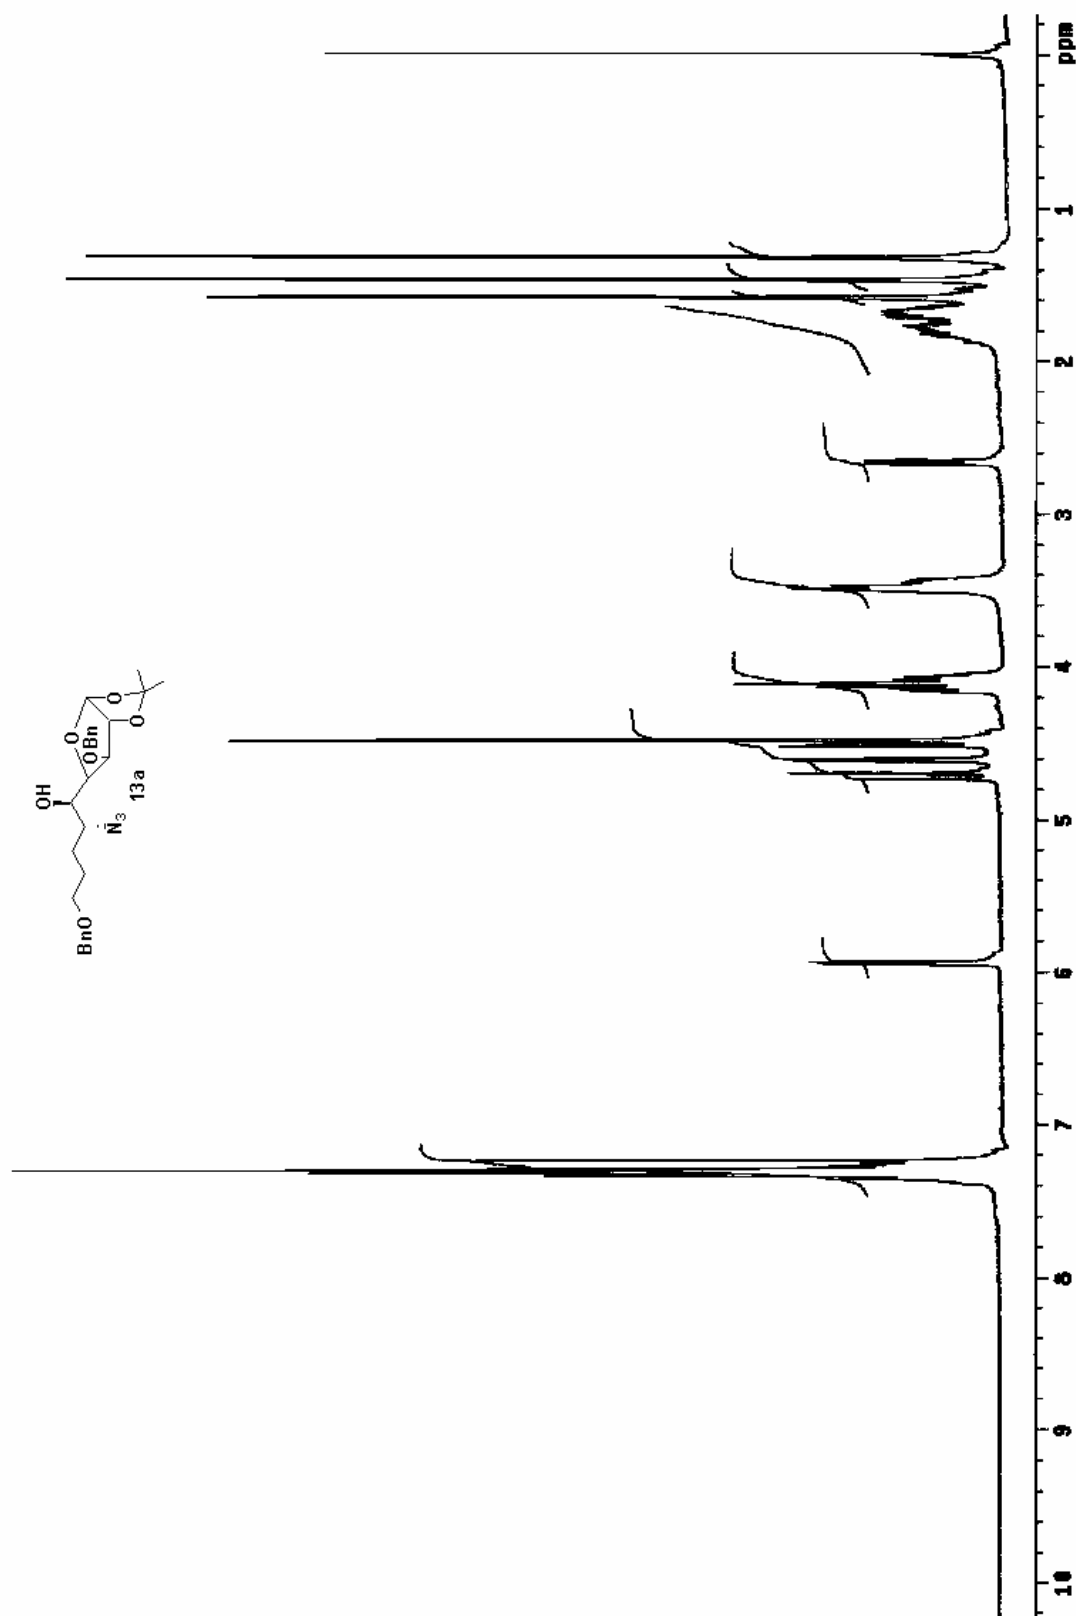

Figure 7: <sup>1</sup>H NMR (300 MHz, CDCl<sub>3</sub>) spectrum of compound 13a

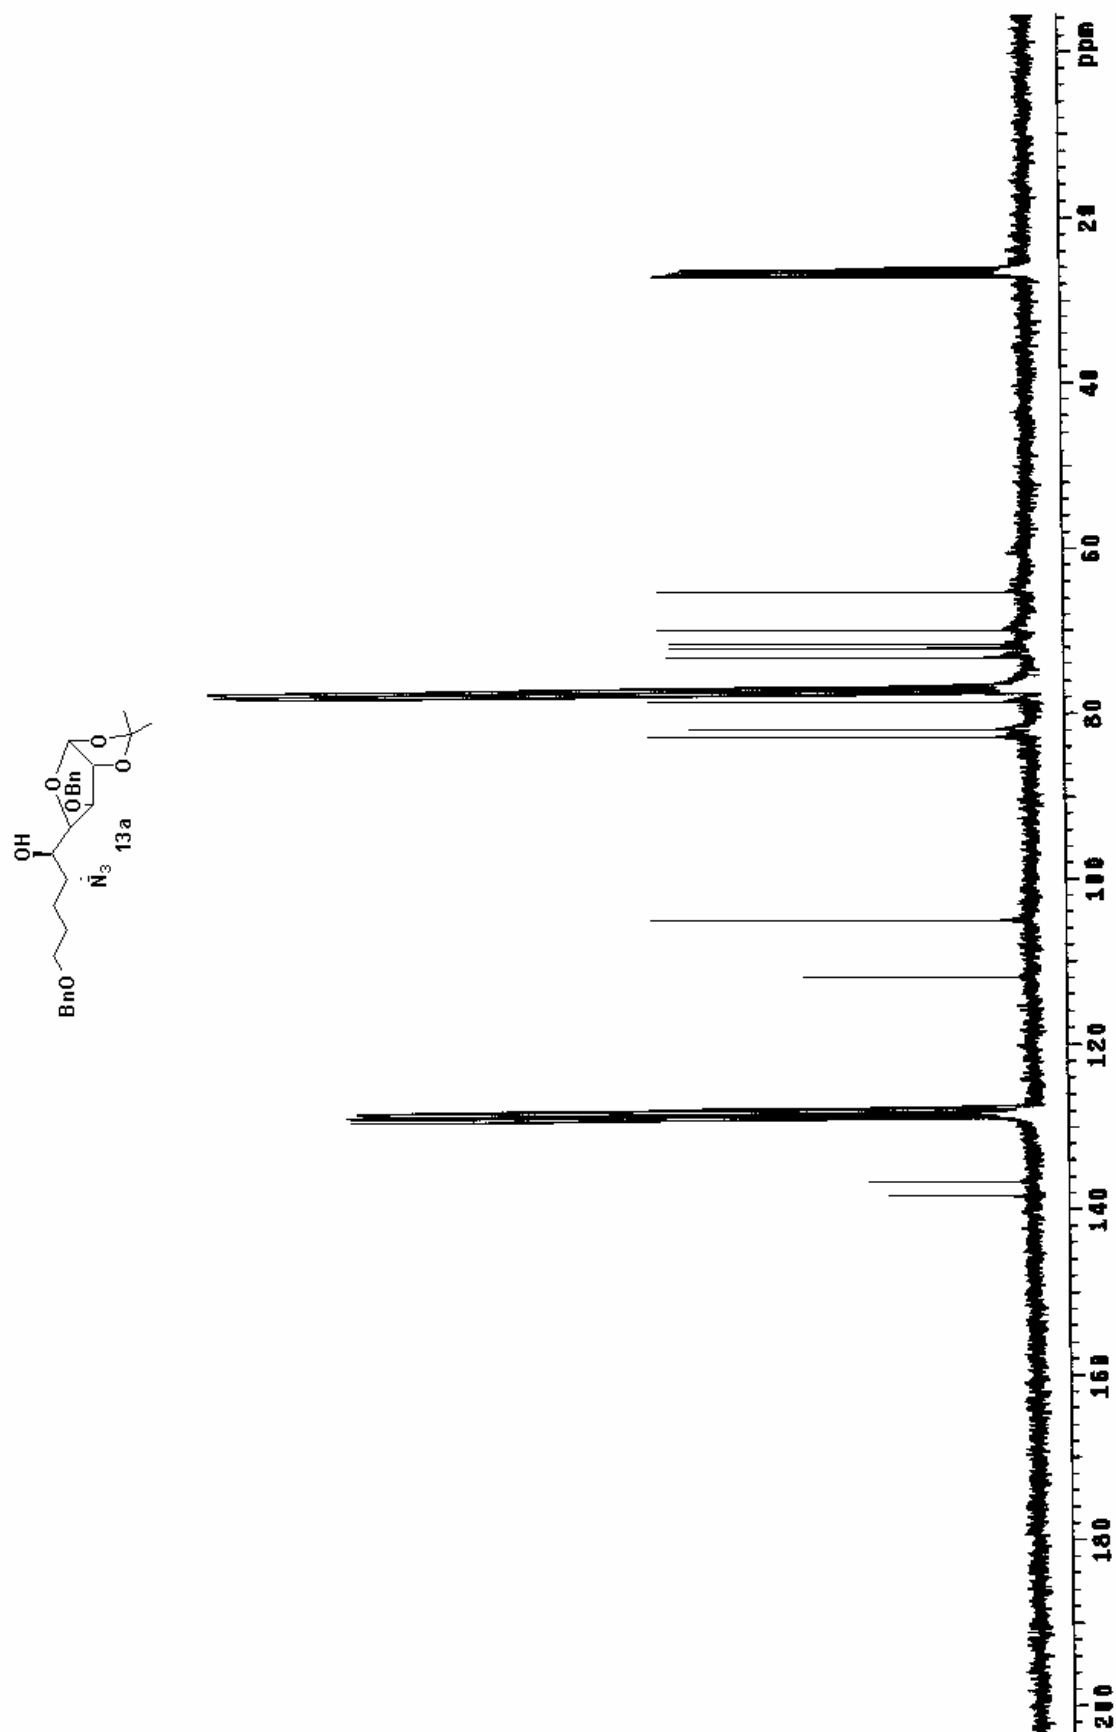

Figure 8:  $^{13}\text{C}$  NMR (75 MHz,  $\text{CDCl}_3$ ) spectrum of compound 13a

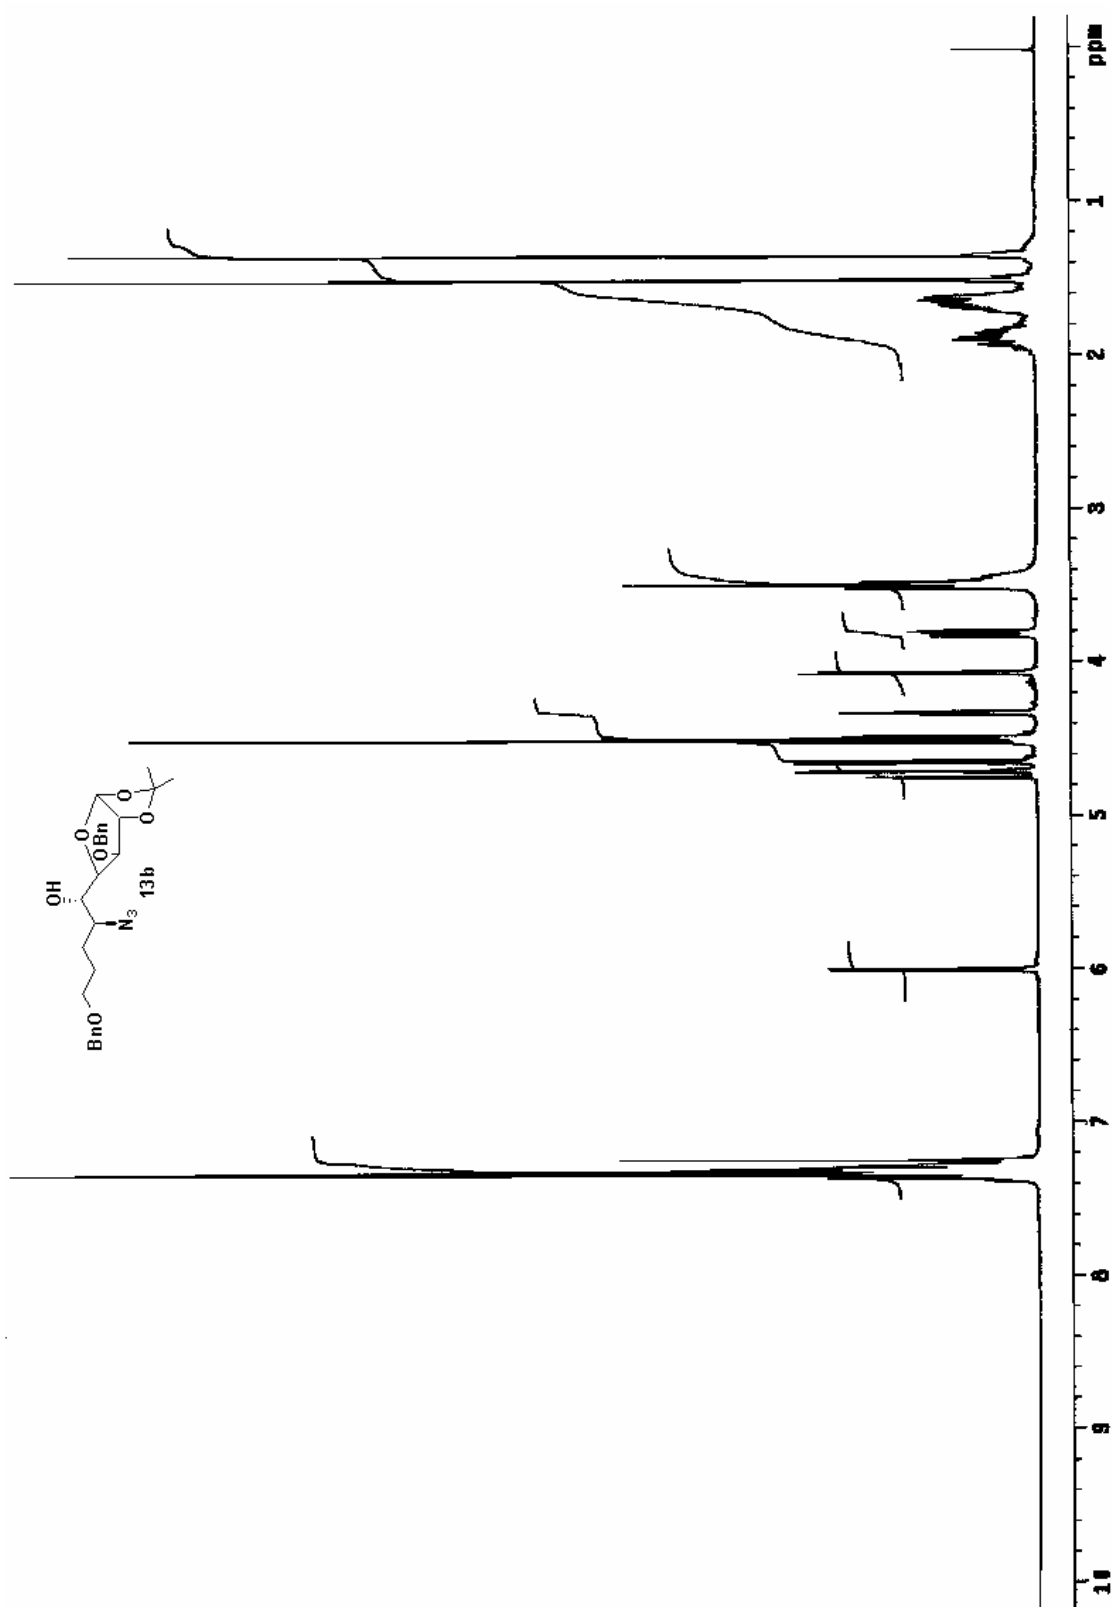

Figure 9:  $^1\text{H}$  NMR (300 MHz,  $\text{CDCl}_3$ ) spectrum of compound 13b



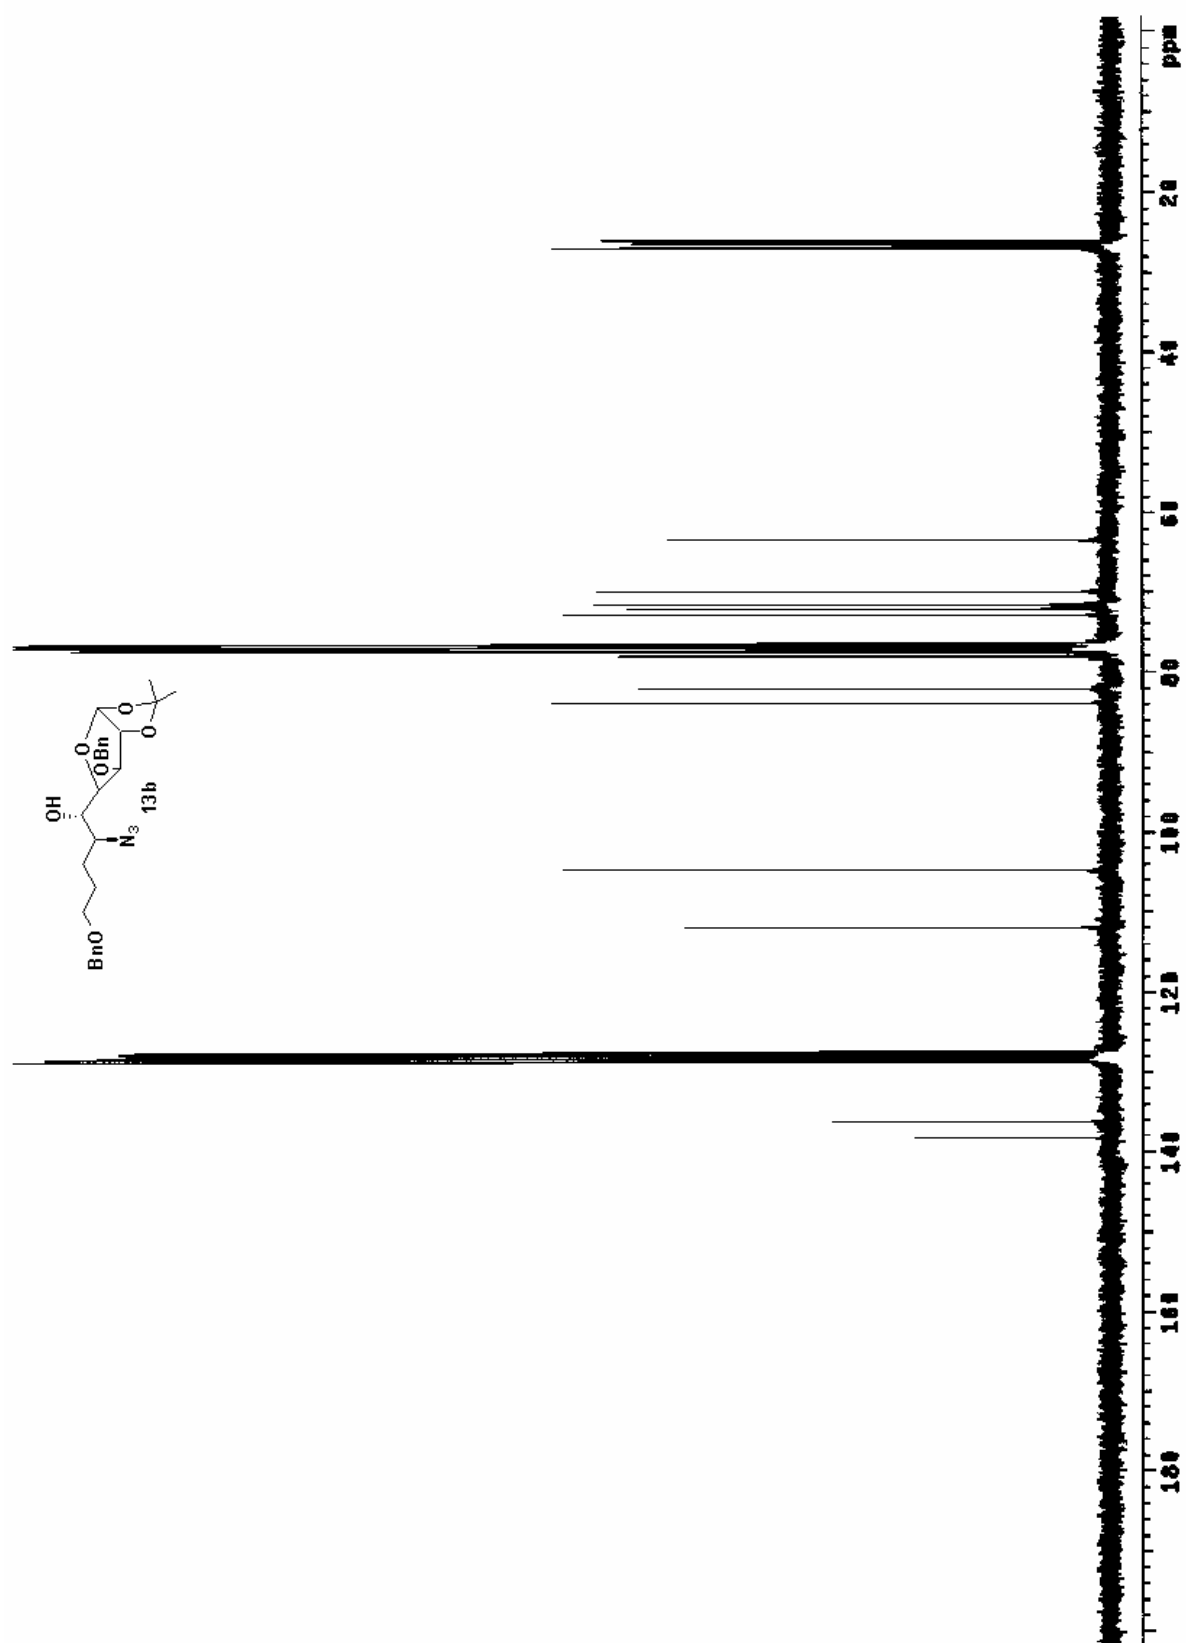

Figure 10: <sup>13</sup>C NMR (75 MHz, CDCl<sub>3</sub>) spectrum of compound 13b

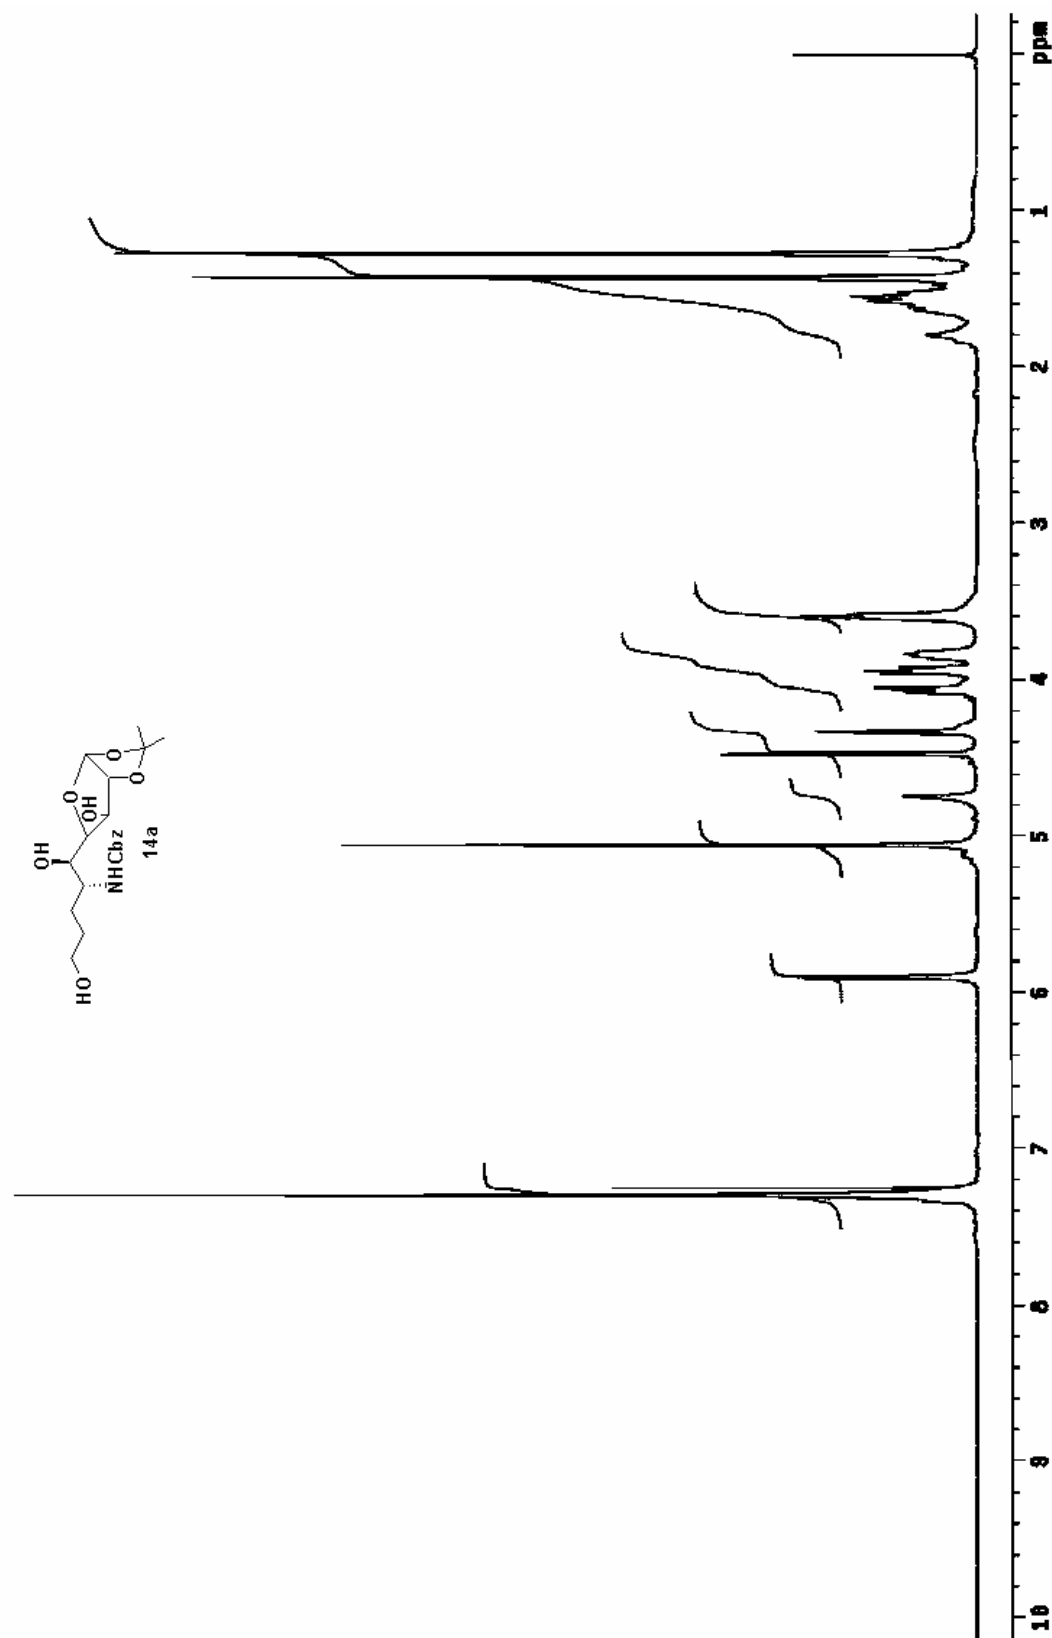

Figure 11: <sup>1</sup>H NMR (300 MHz, CDCl<sub>3</sub> + D<sub>2</sub>O) spectrum of compound 14a

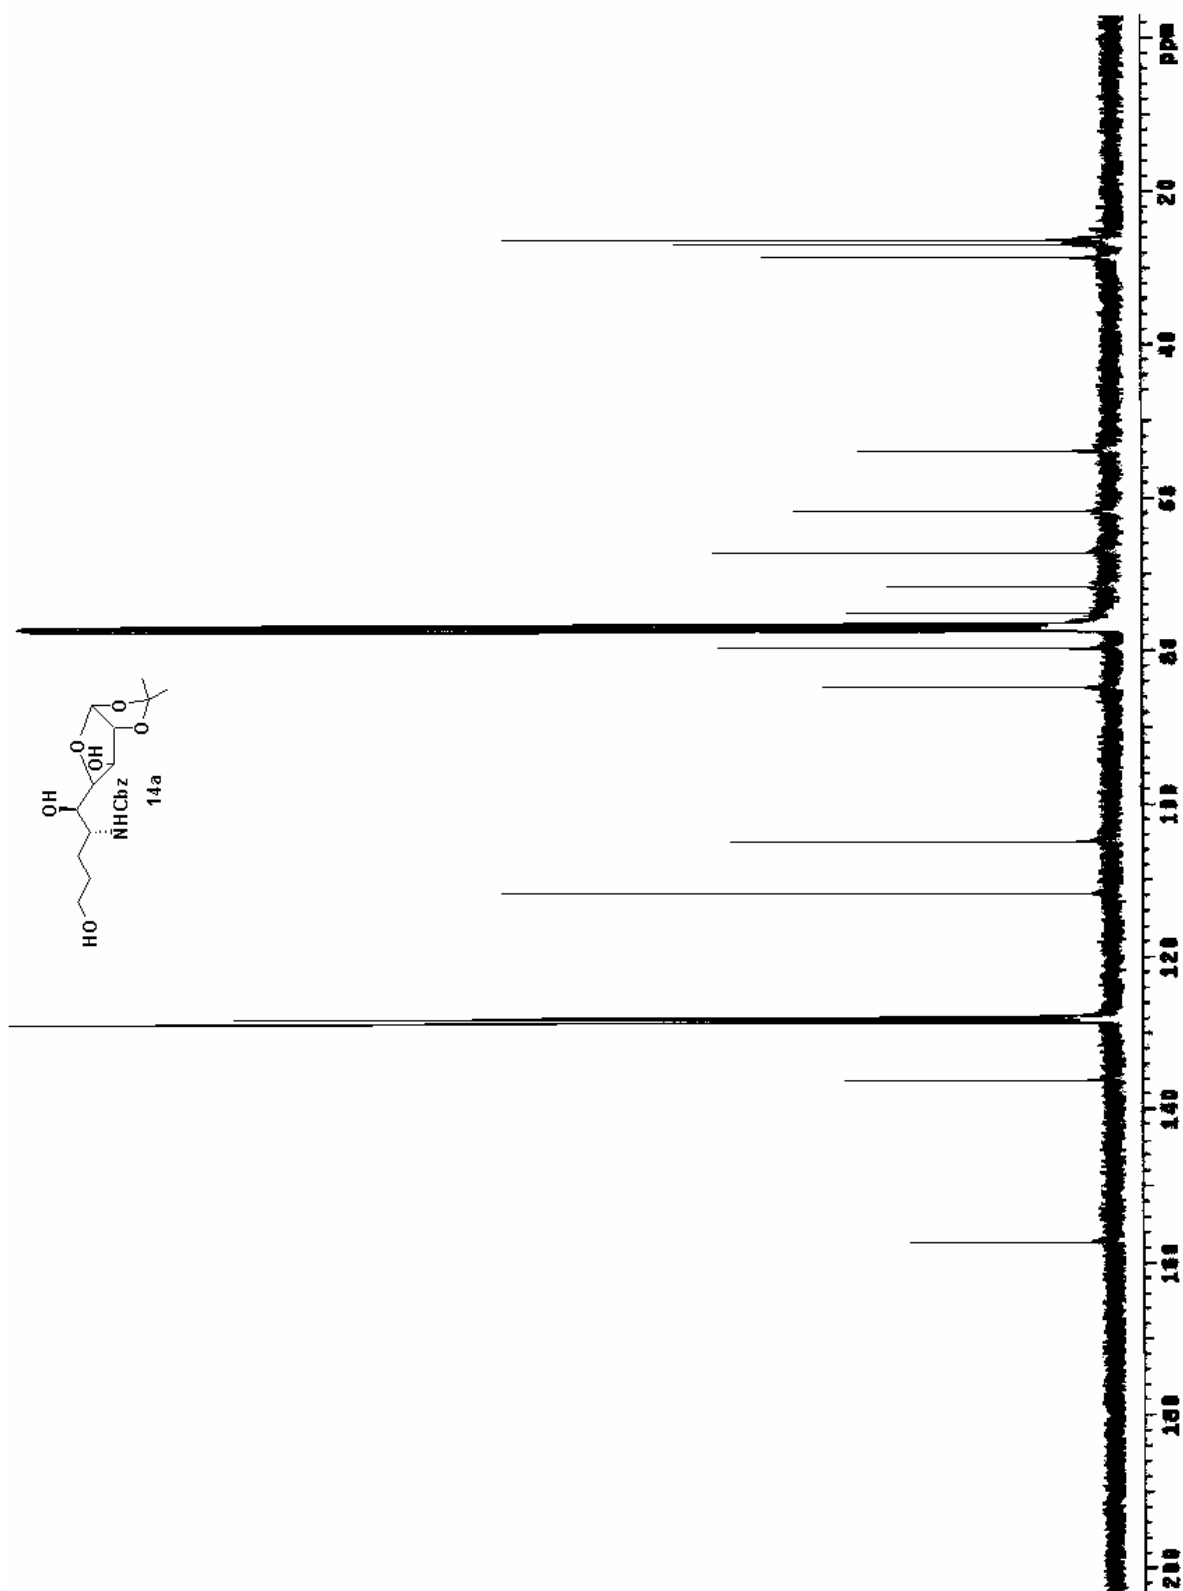

Figure 12:  $^{13}\text{C}$  NMR (75 MHz,  $\text{CDCl}_3$ ) spectrum of compound 14a

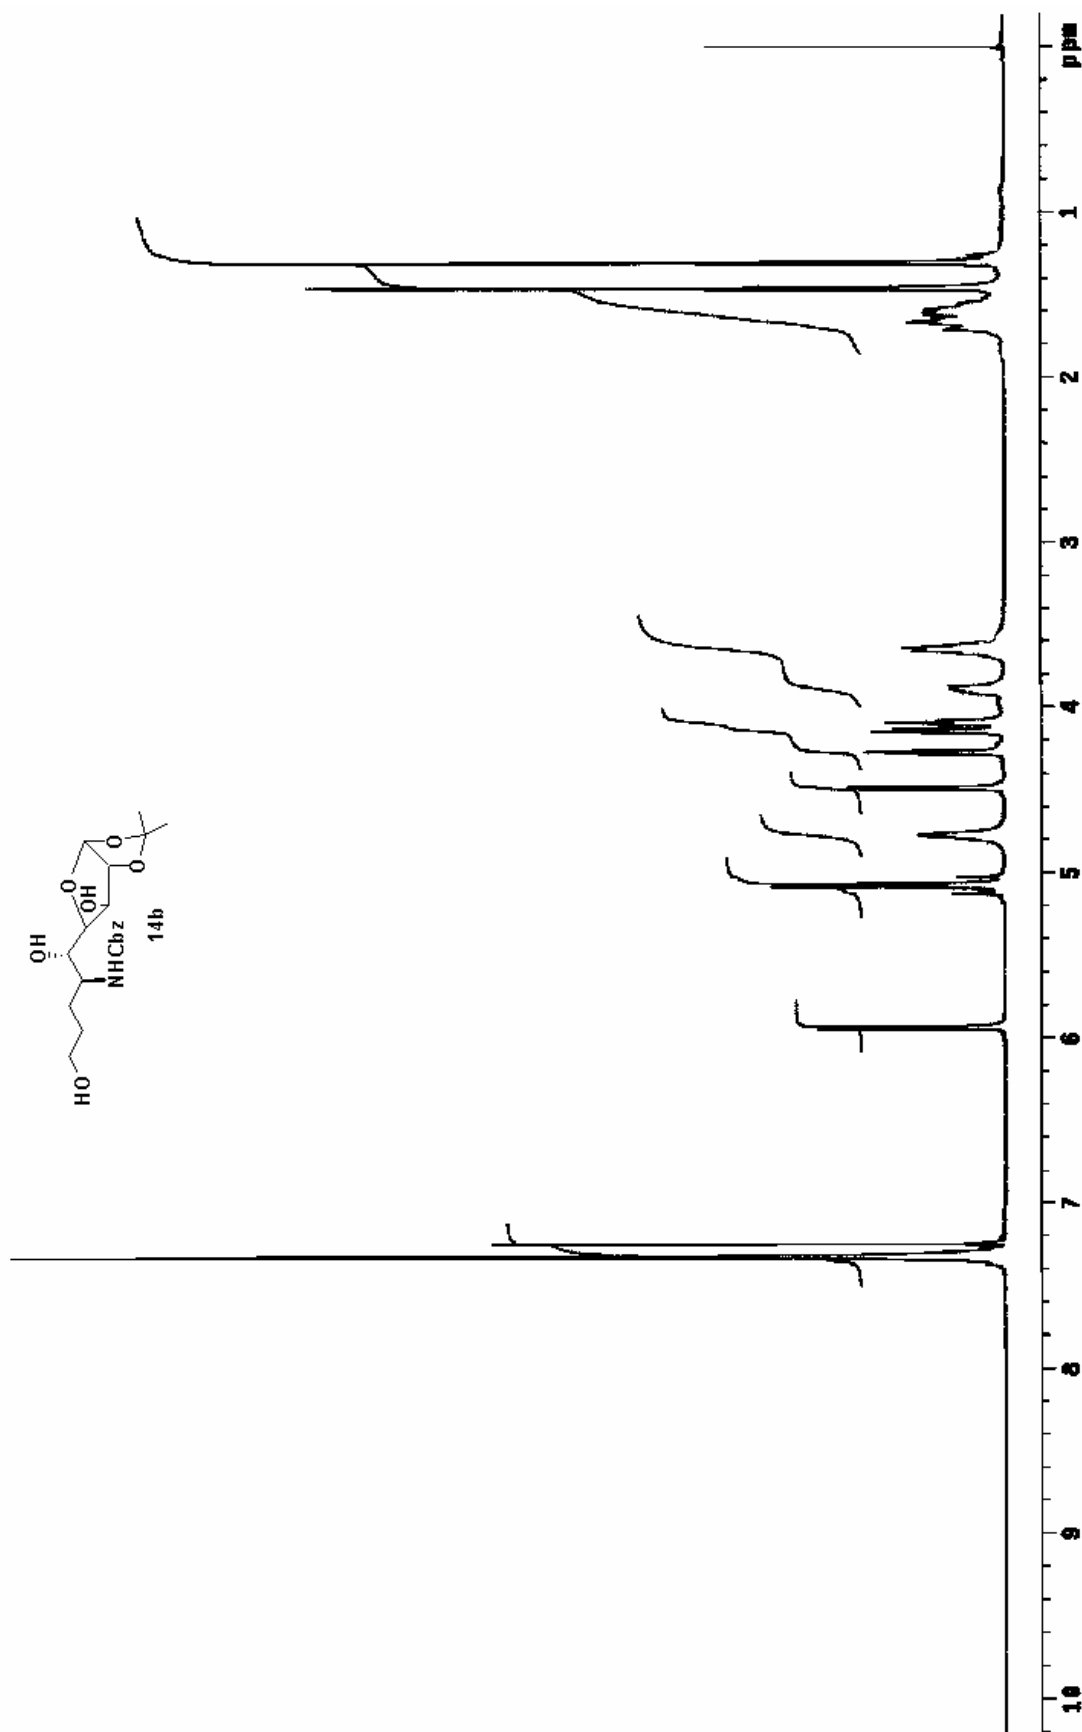

Figure 13: <sup>1</sup>H NMR (300 MHz, CDCl<sub>3</sub> + D<sub>2</sub>O) spectrum of compound 14b

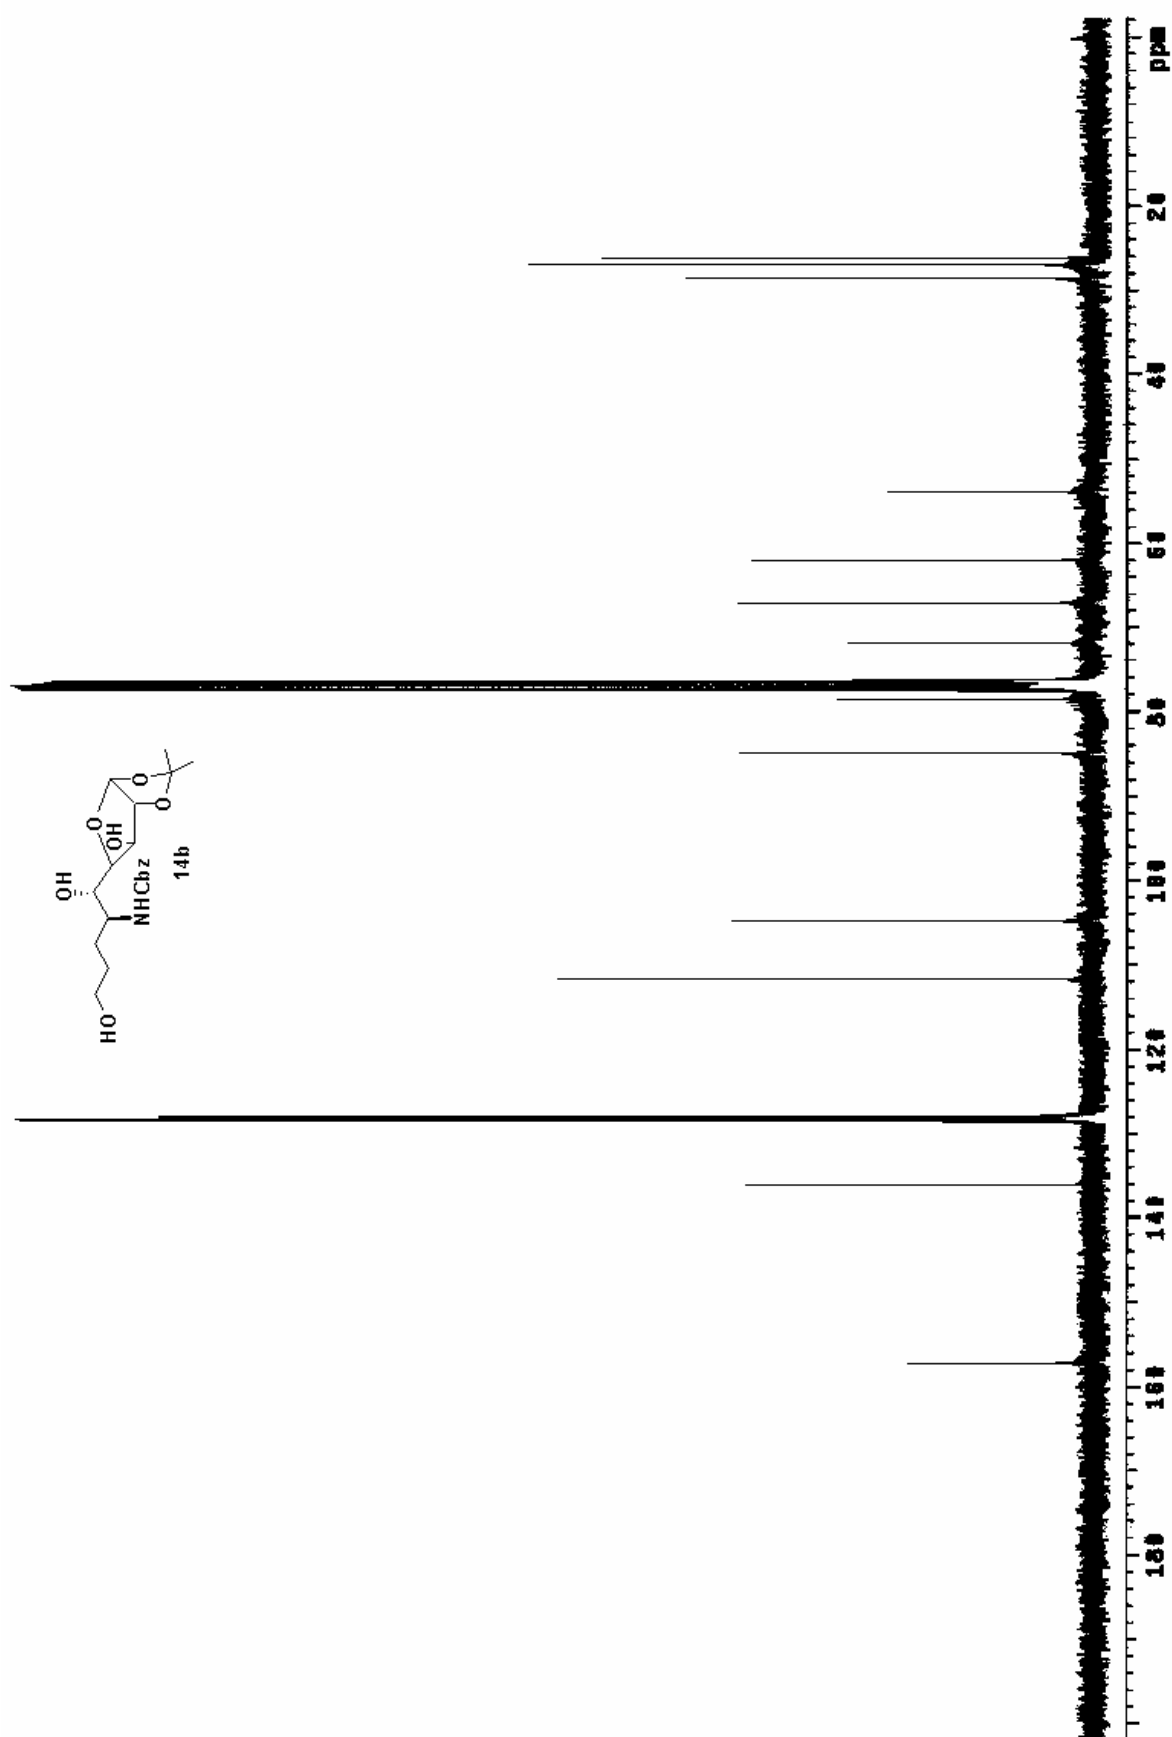

Figure 14: <sup>13</sup>C NMR (75 MHz, CDCl<sub>3</sub>) spectrum of compound 14b

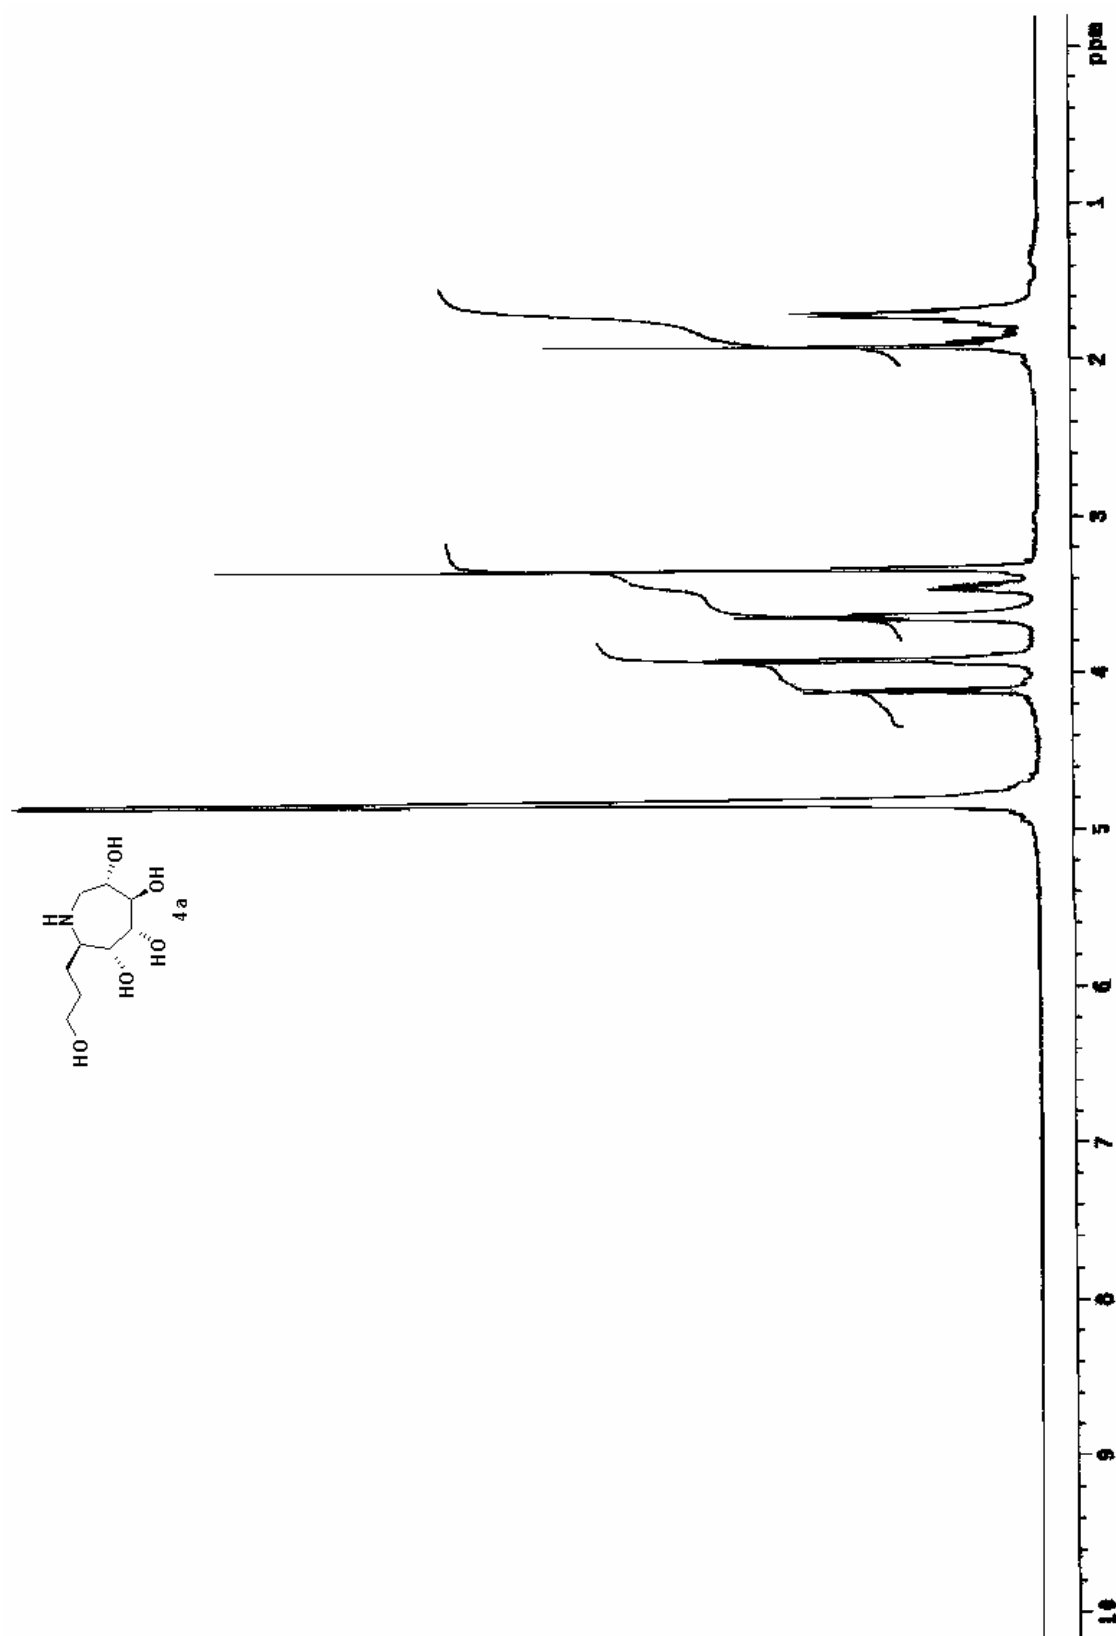

Figure 15: <sup>1</sup>H NMR (300 MHz, D<sub>2</sub>O) spectrum of compound 4a

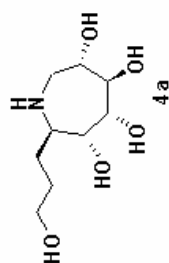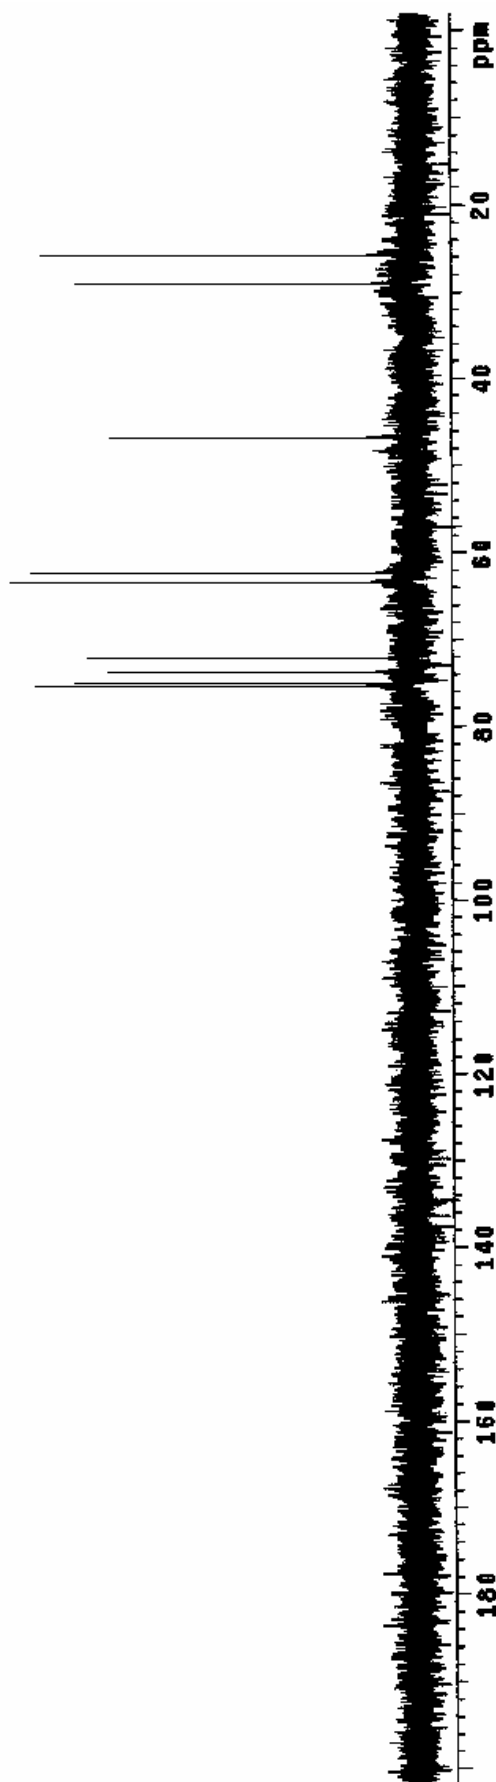

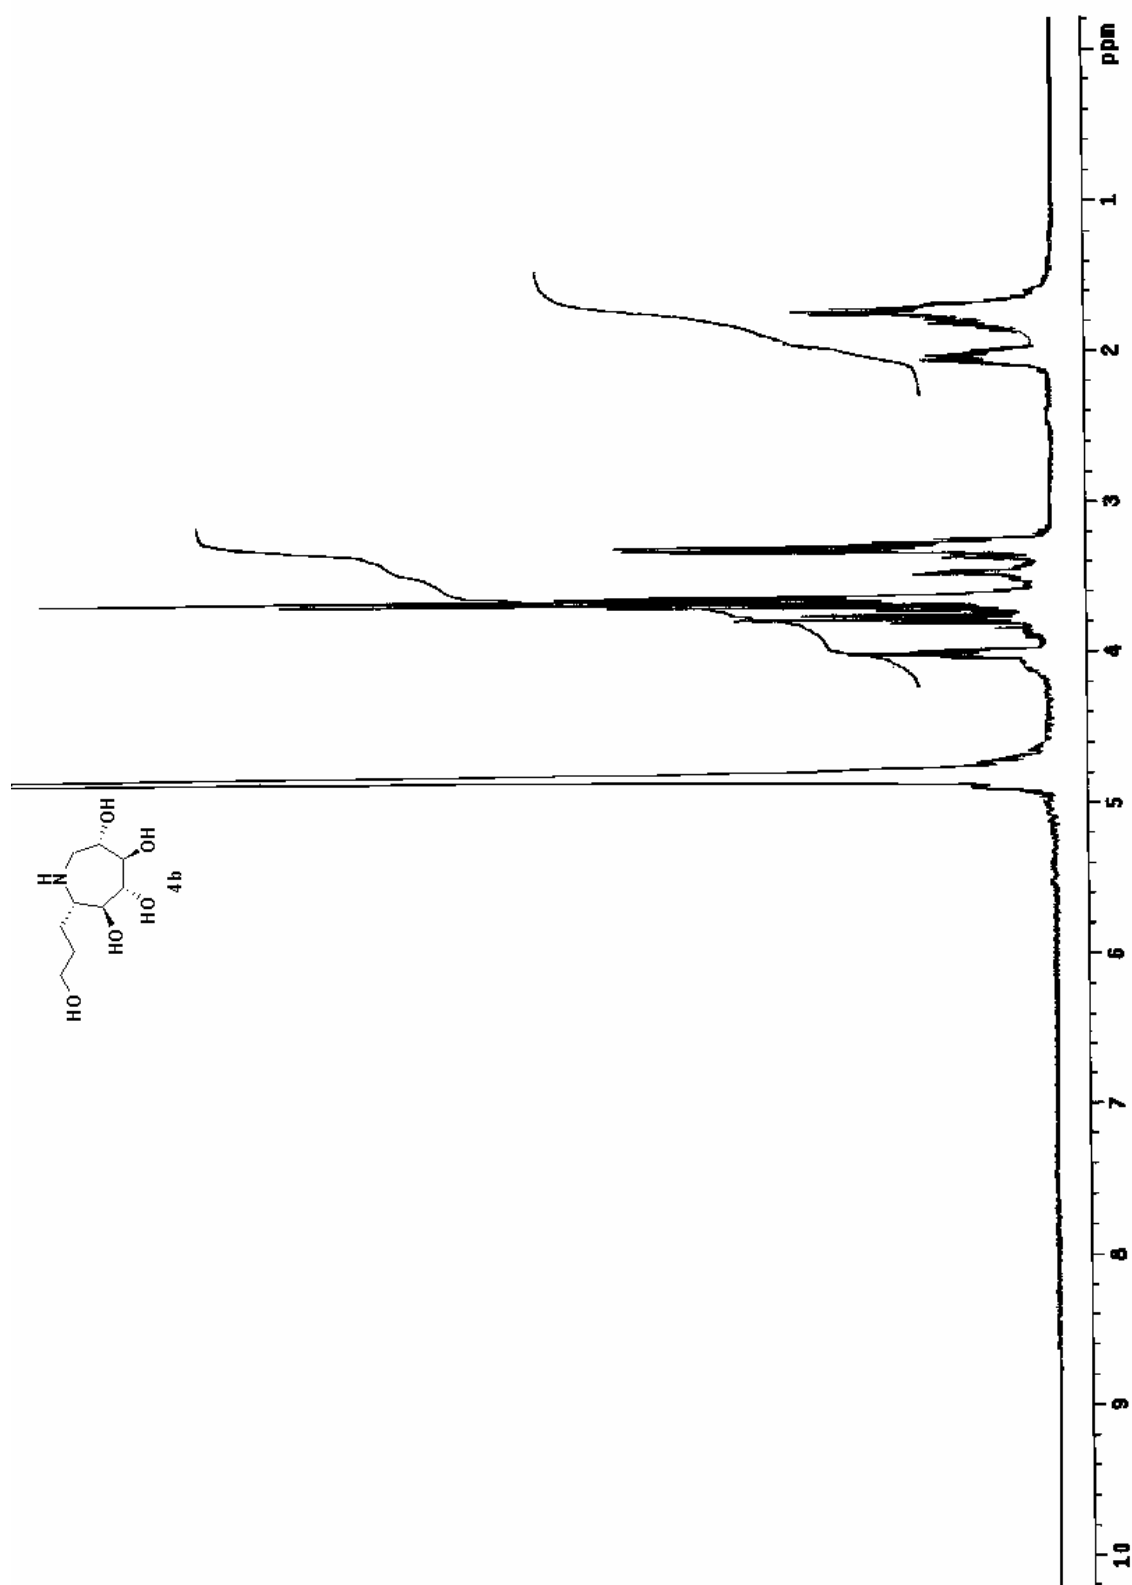

Figure 17: <sup>1</sup>H NMR (300 MHz, D<sub>2</sub>O) spectrum of compound 4b



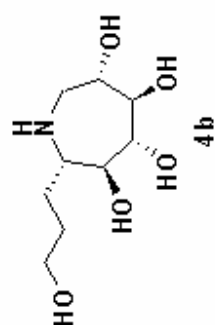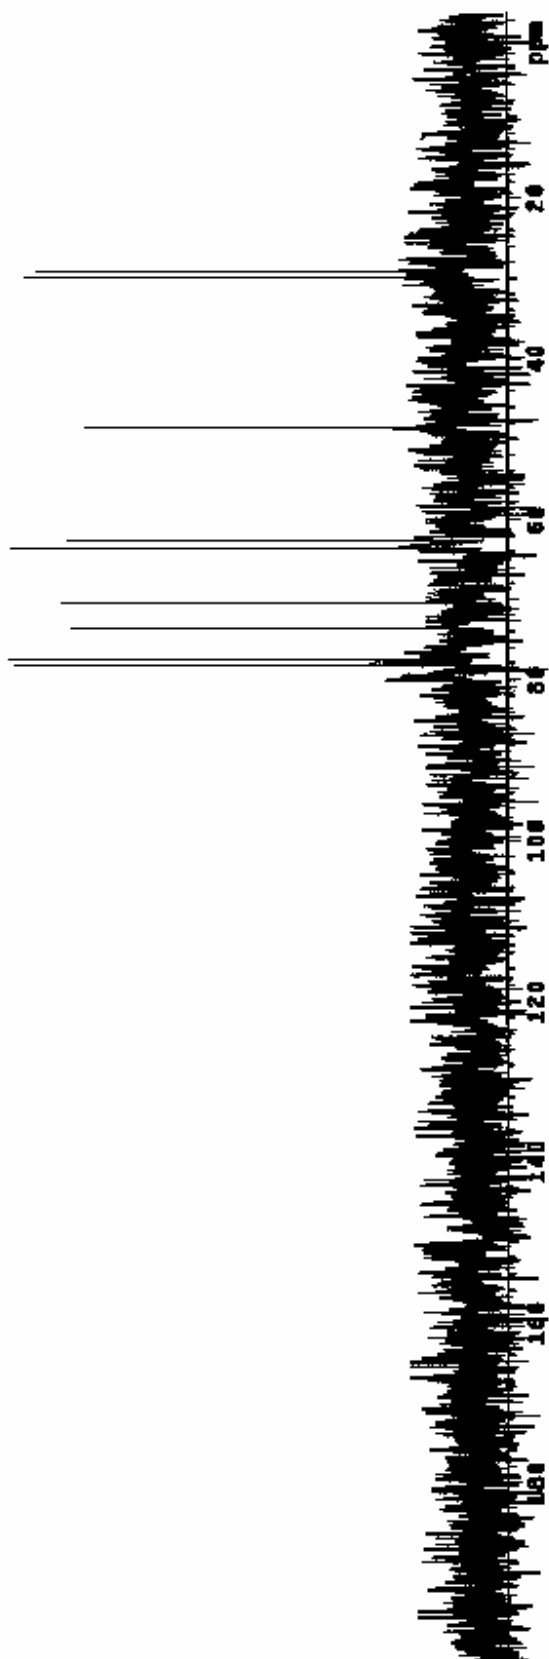

Figure 18:  $^{13}\text{C}$  NMR (75 MHz,  $\text{D}_2\text{O}$ ) spectrum of compound 4b

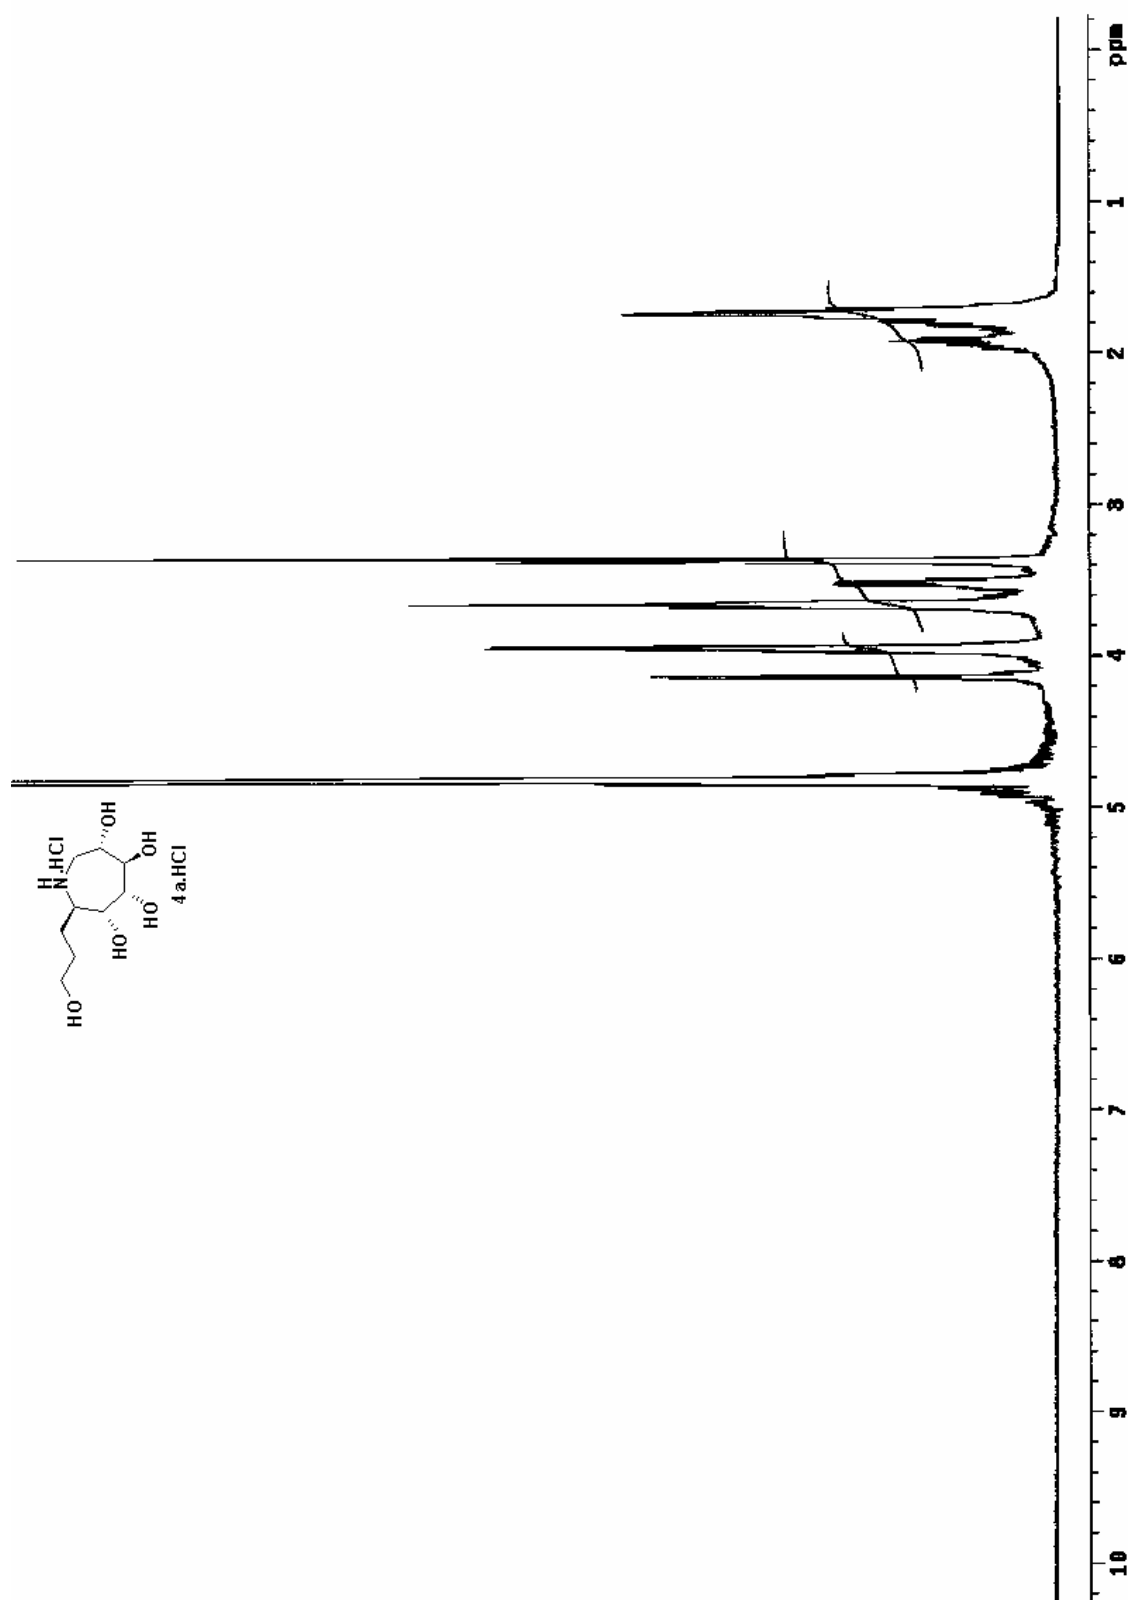

Figure 19: <sup>1</sup>H NMR (300 MHz, D<sub>2</sub>O) spectrum of compound 4a.HCl

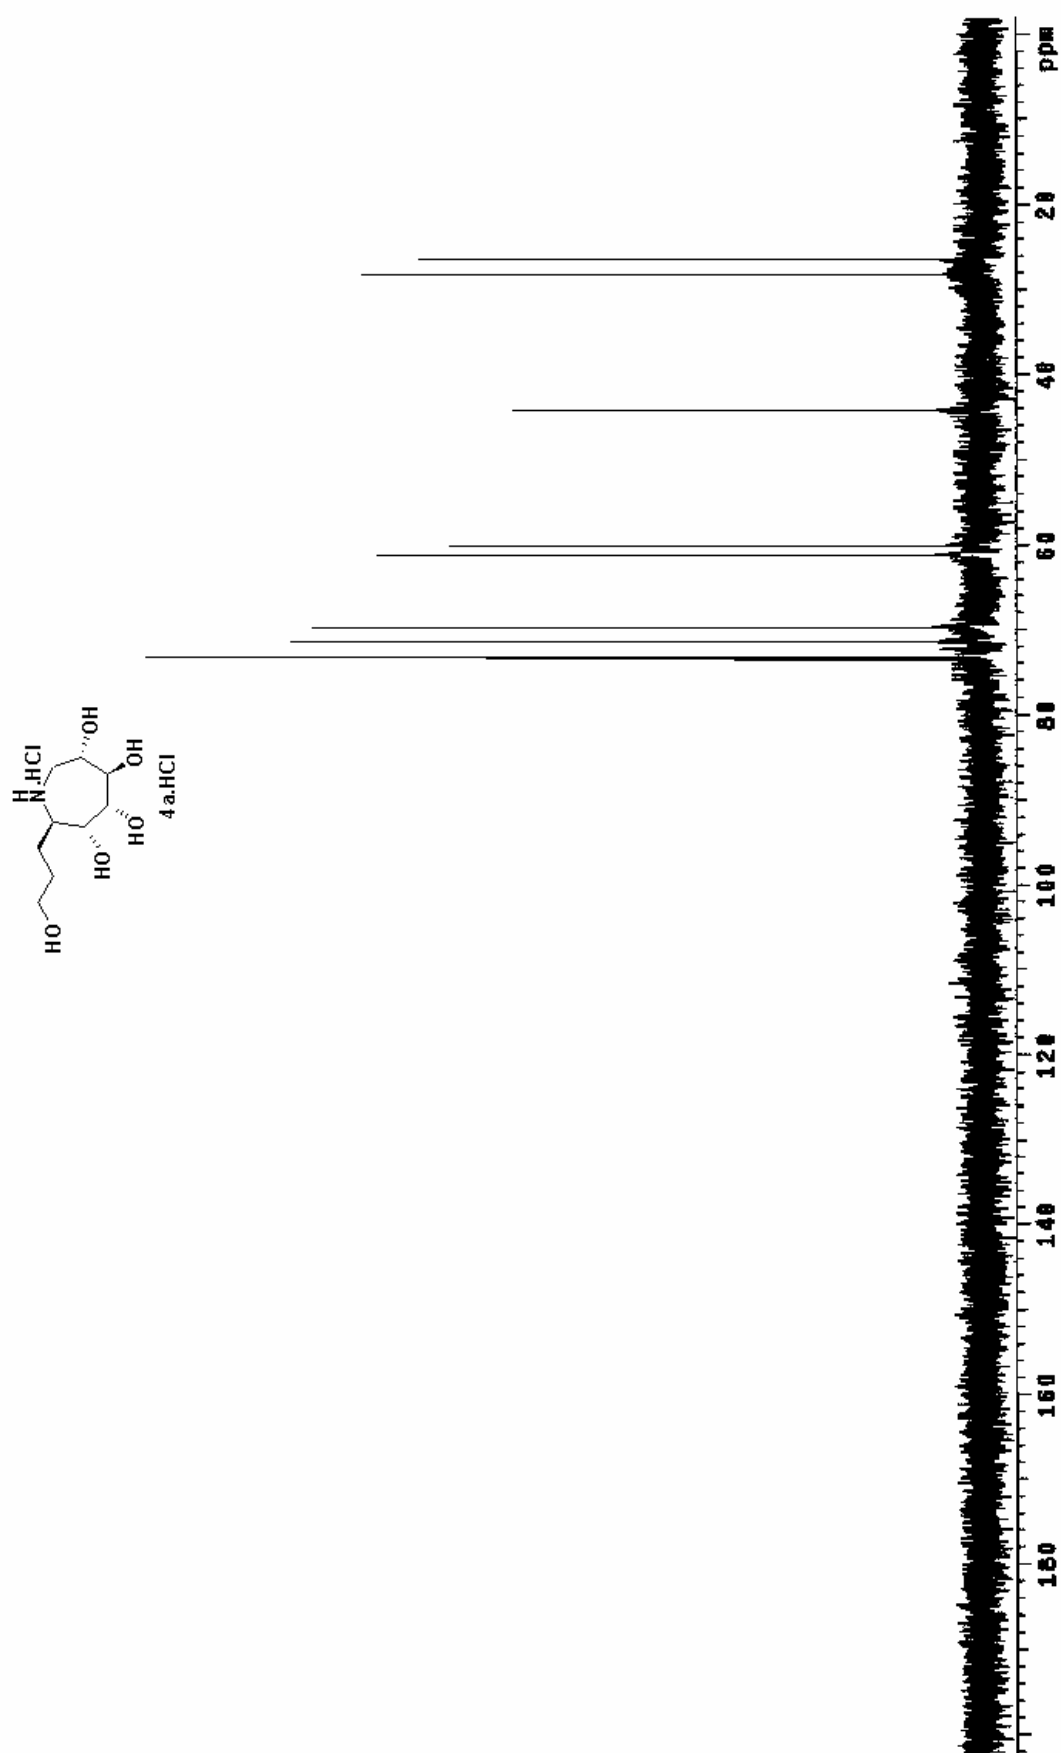

Figure 20:  $^{13}\text{C}$  NMR (75 MHz,  $\text{D}_2\text{O}$ ) spectrum of compound 4a.HCl

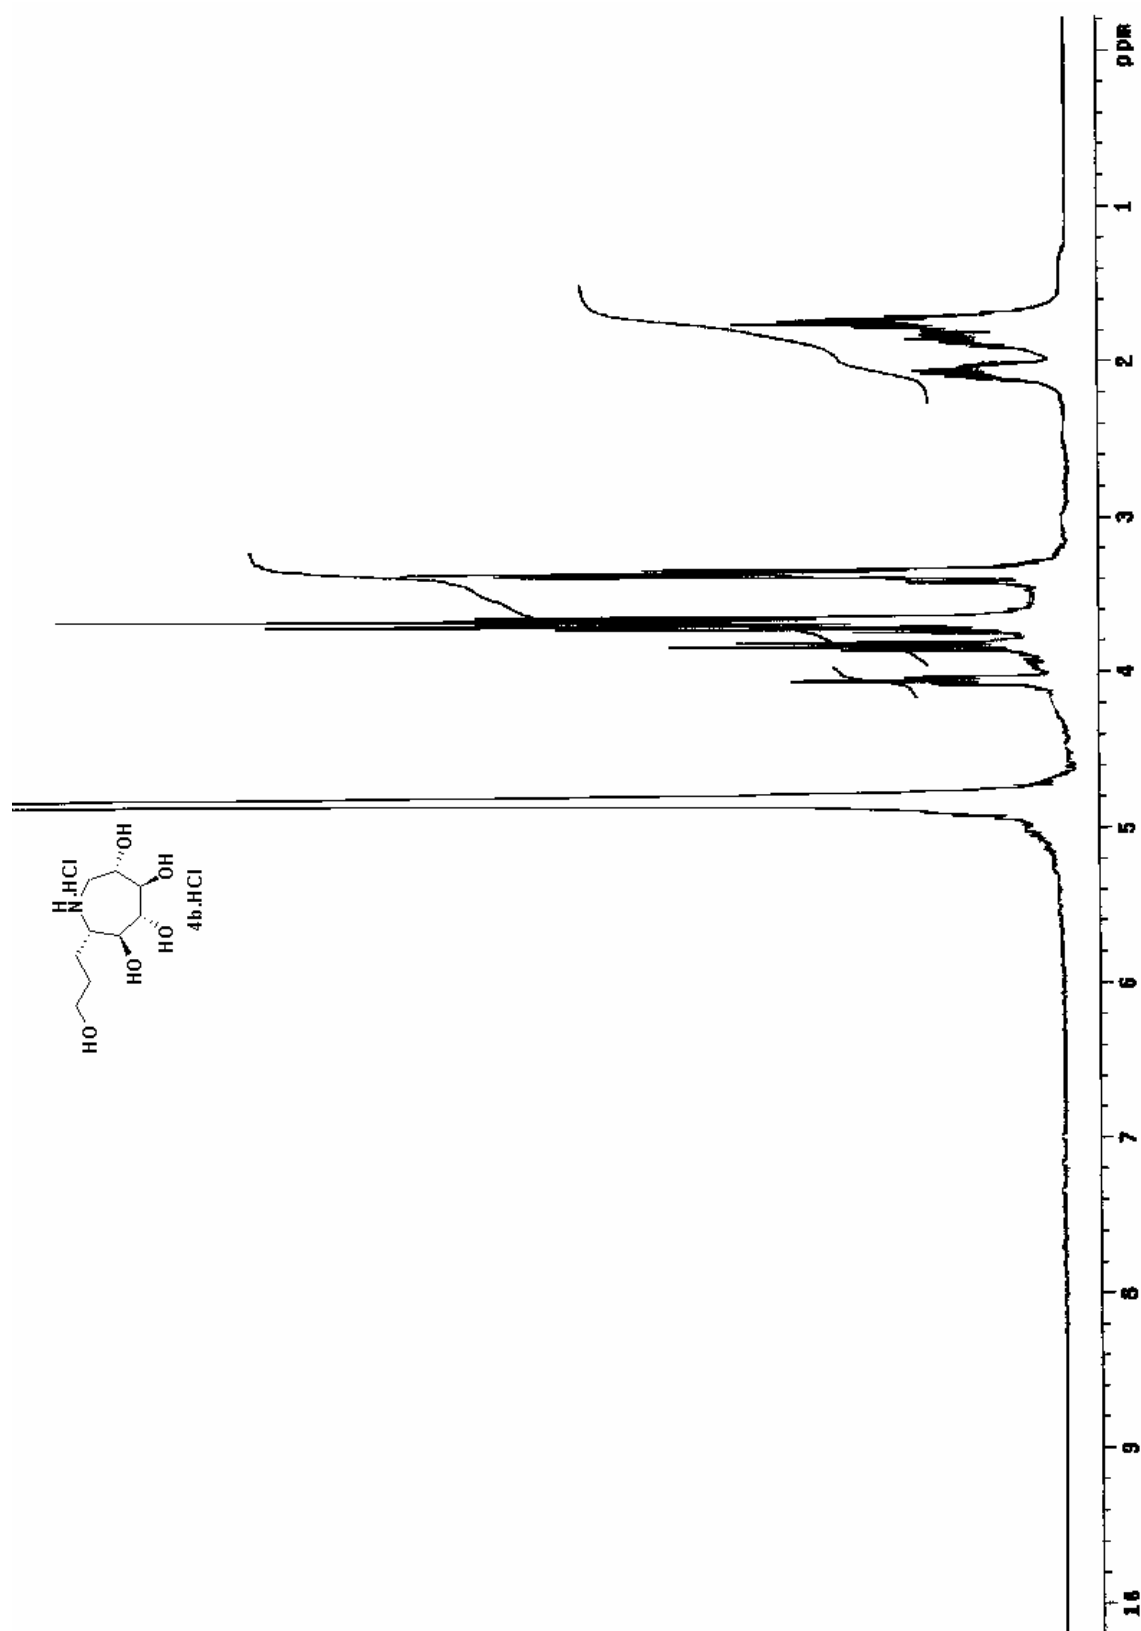

Figure 21: <sup>1</sup>H NMR (300 MHz, D<sub>2</sub>O) spectrum of compound 4b.HCl

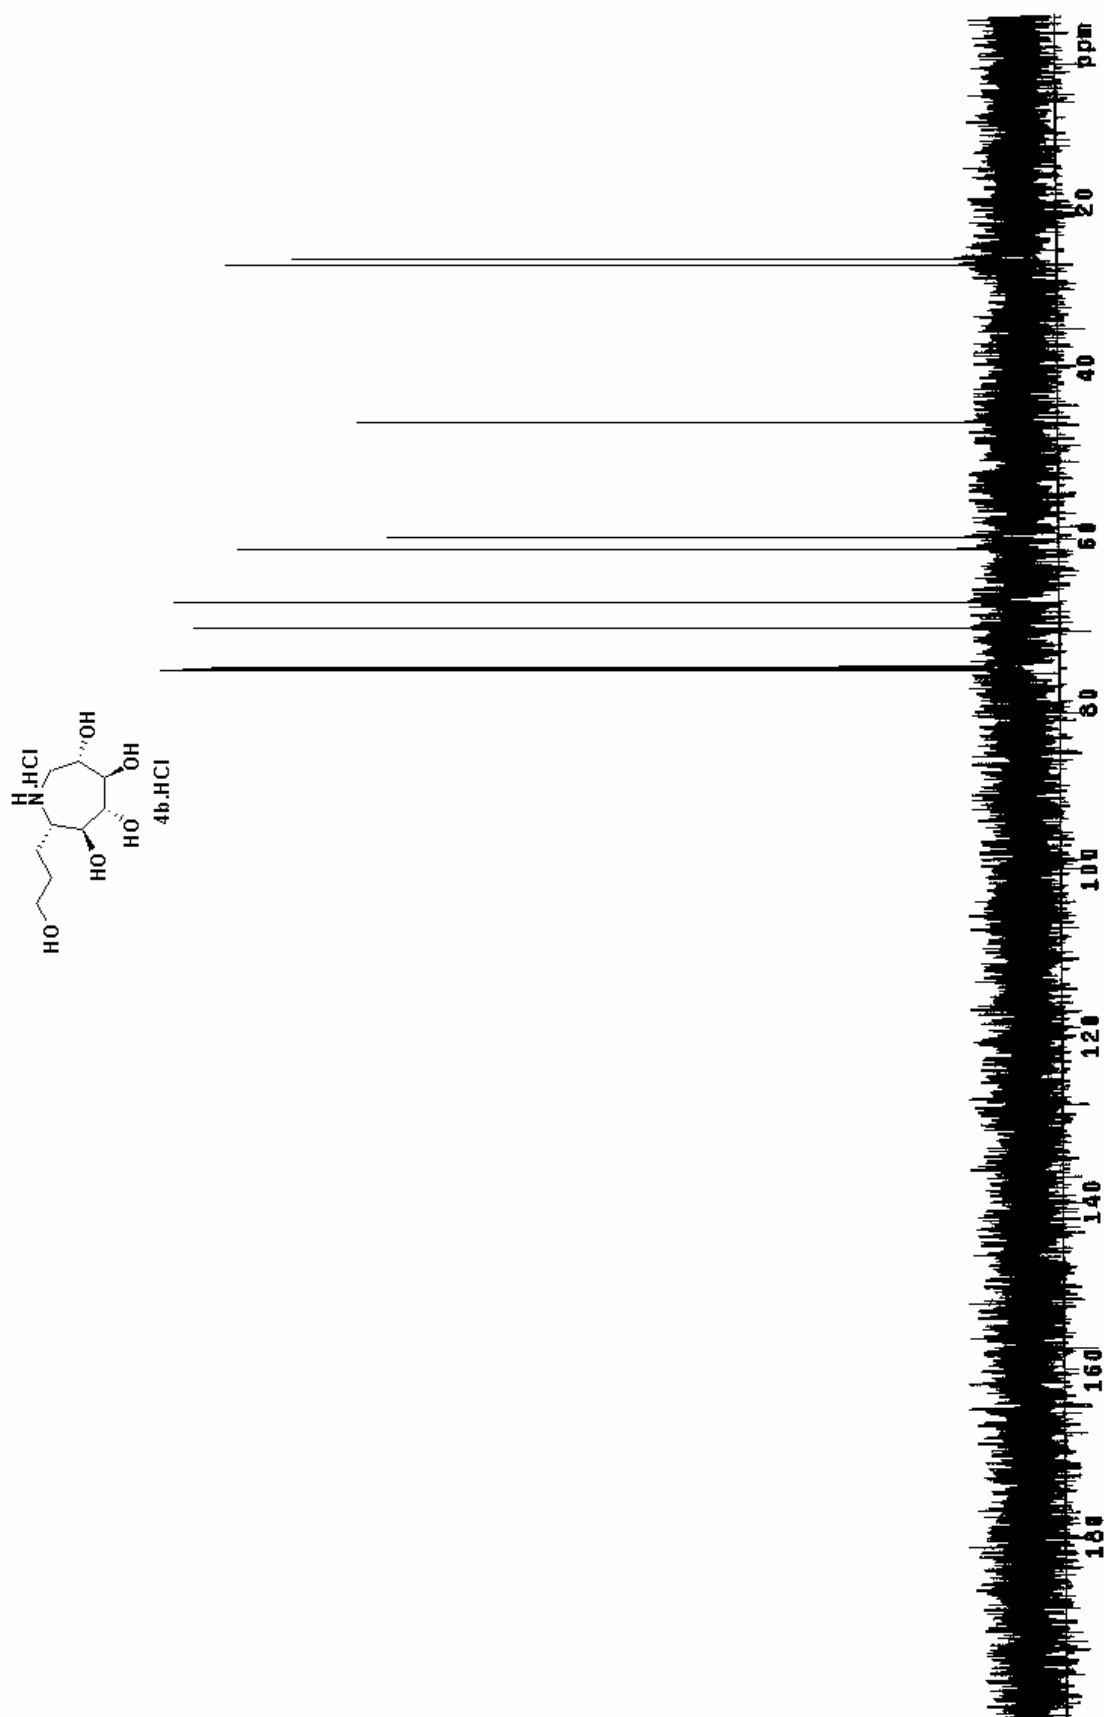

Figure 22:  $^{13}\text{C}$  NMR (75 MHz,  $\text{D}_2\text{O}$ ) spectrum of compound 4b.HCl

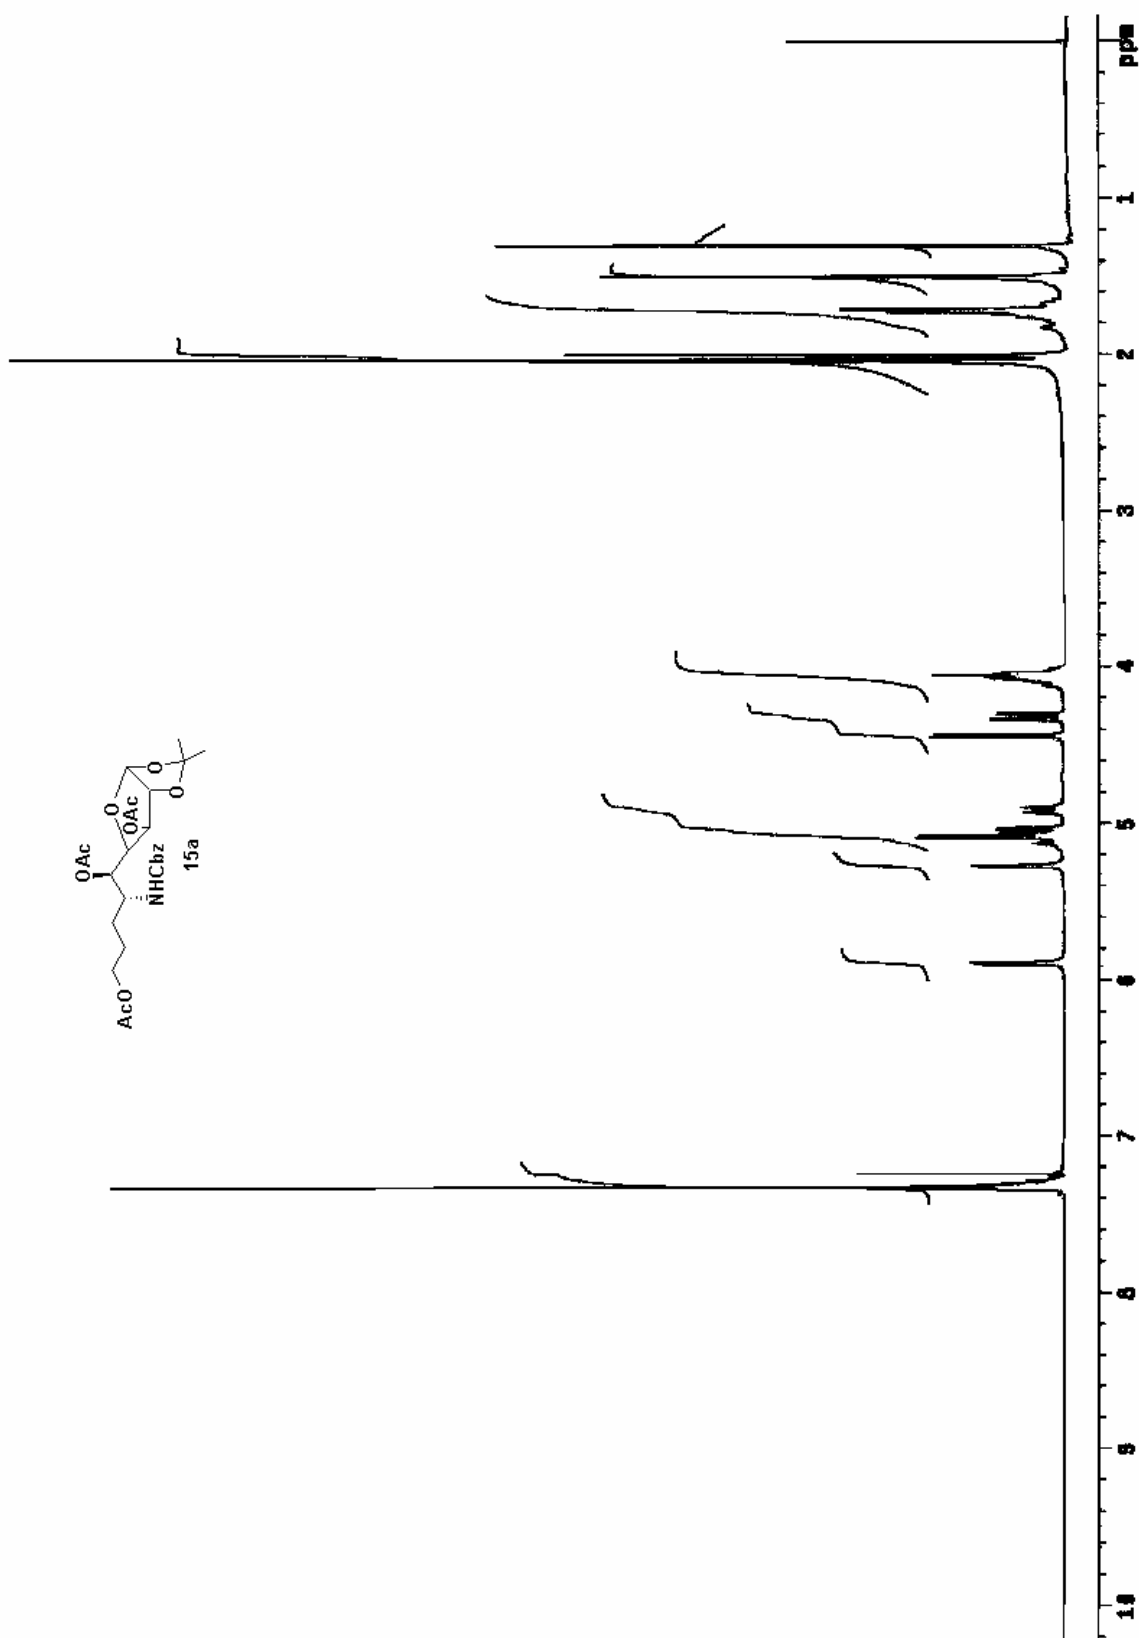

Figure 23: <sup>1</sup>H NMR (300 MHz, CDCl<sub>3</sub>) spectrum of compound 15a

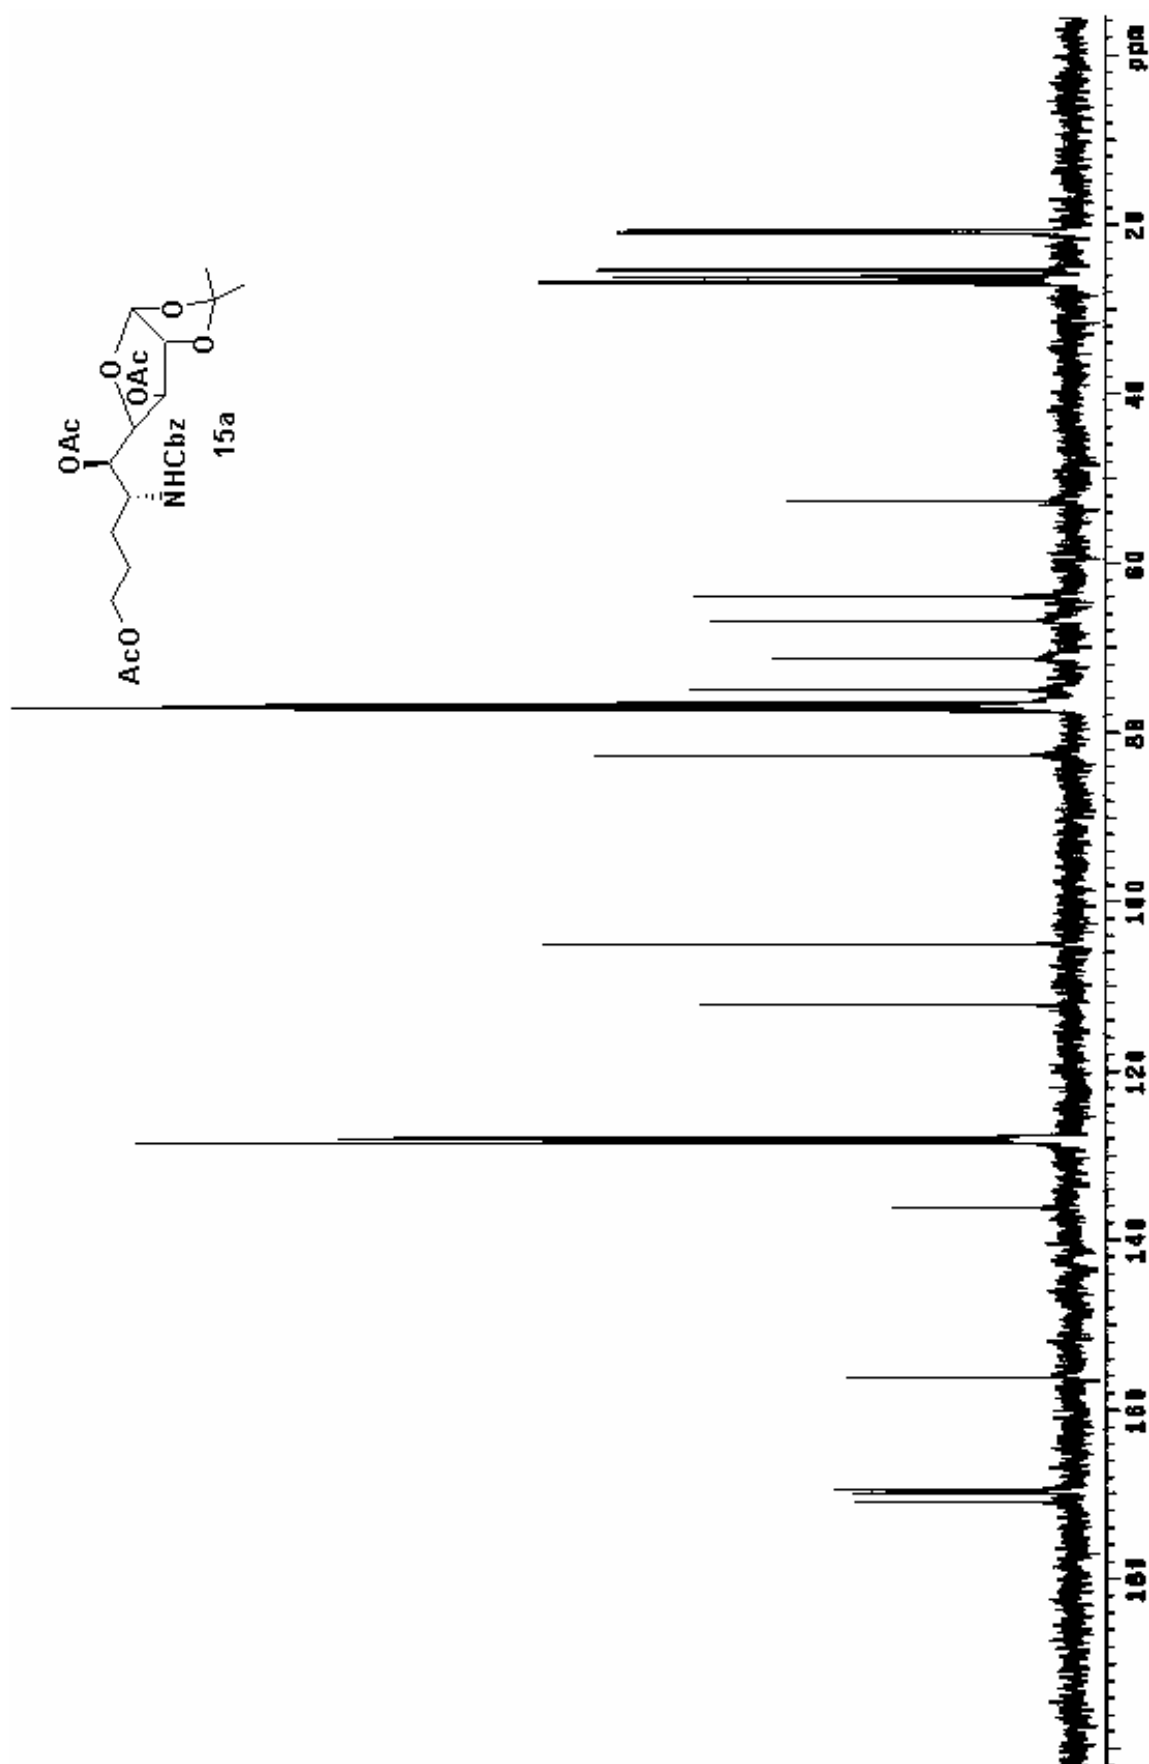

Figure 24:  $^{13}\text{C}$  NMR (75 MHz,  $\text{CDCl}_3$ ) spectrum of compound 15a

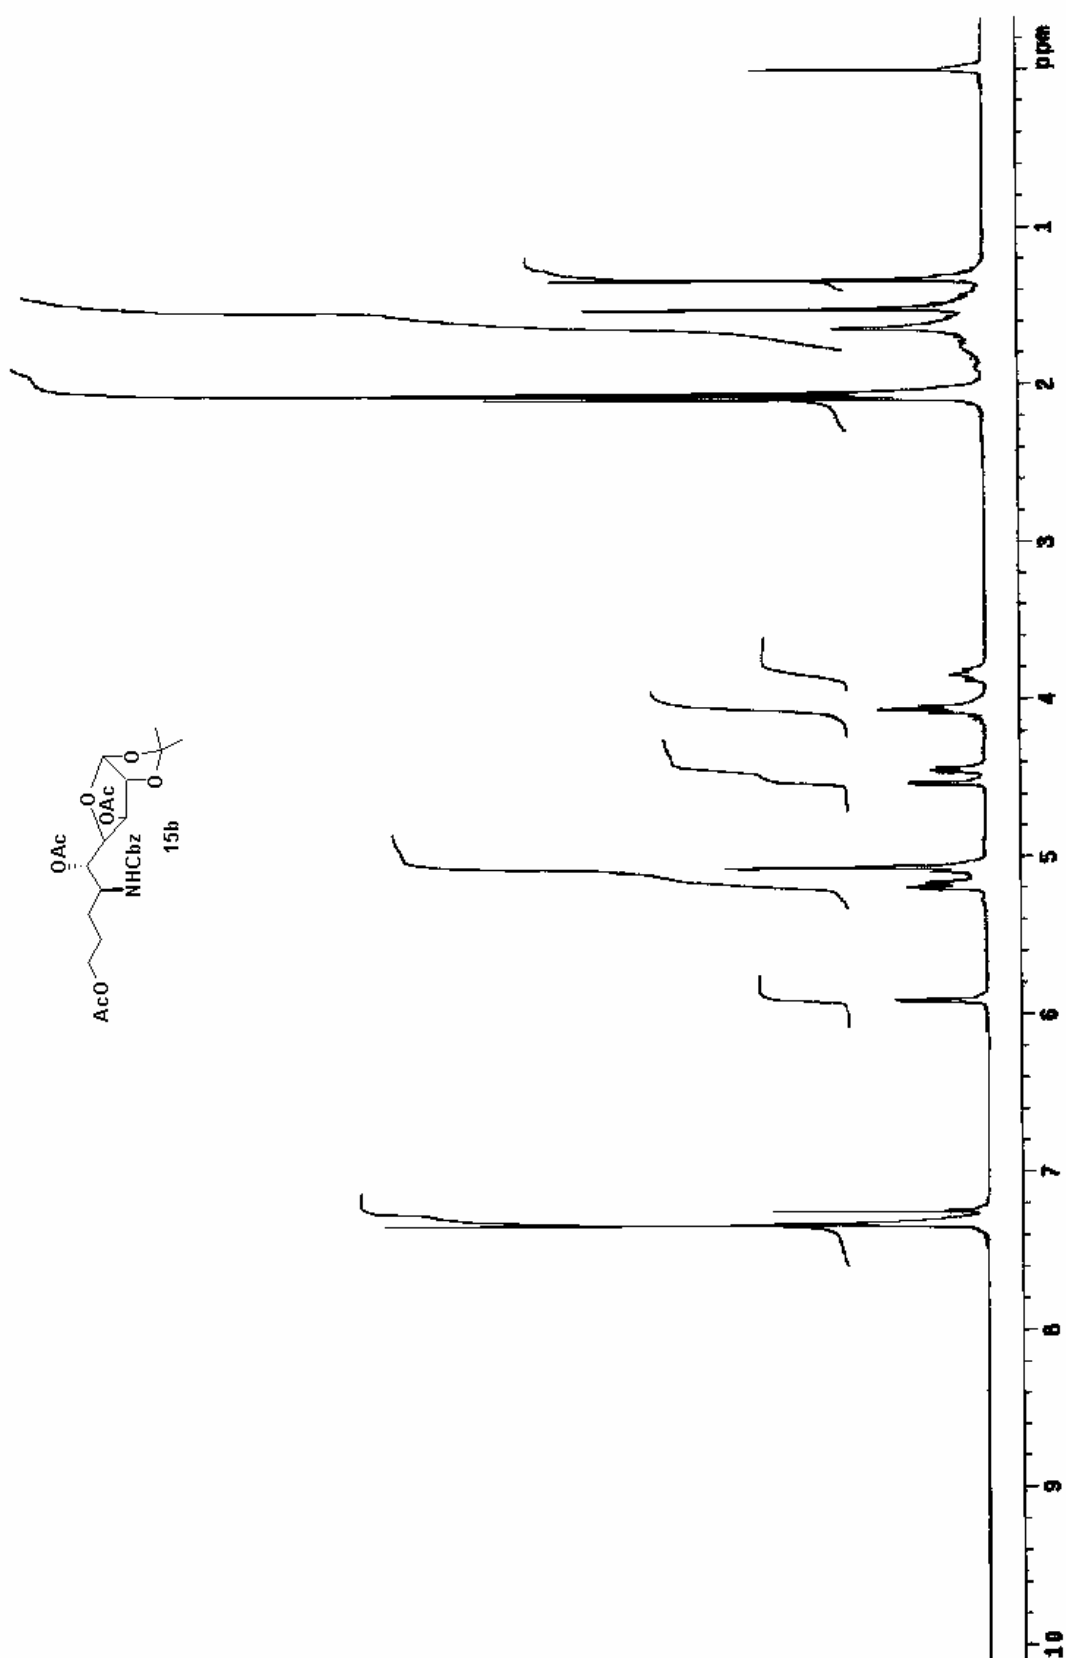

Figure 25: <sup>1</sup>H NMR (300 MHz, CDCl<sub>3</sub>) spectrum of compound 15b



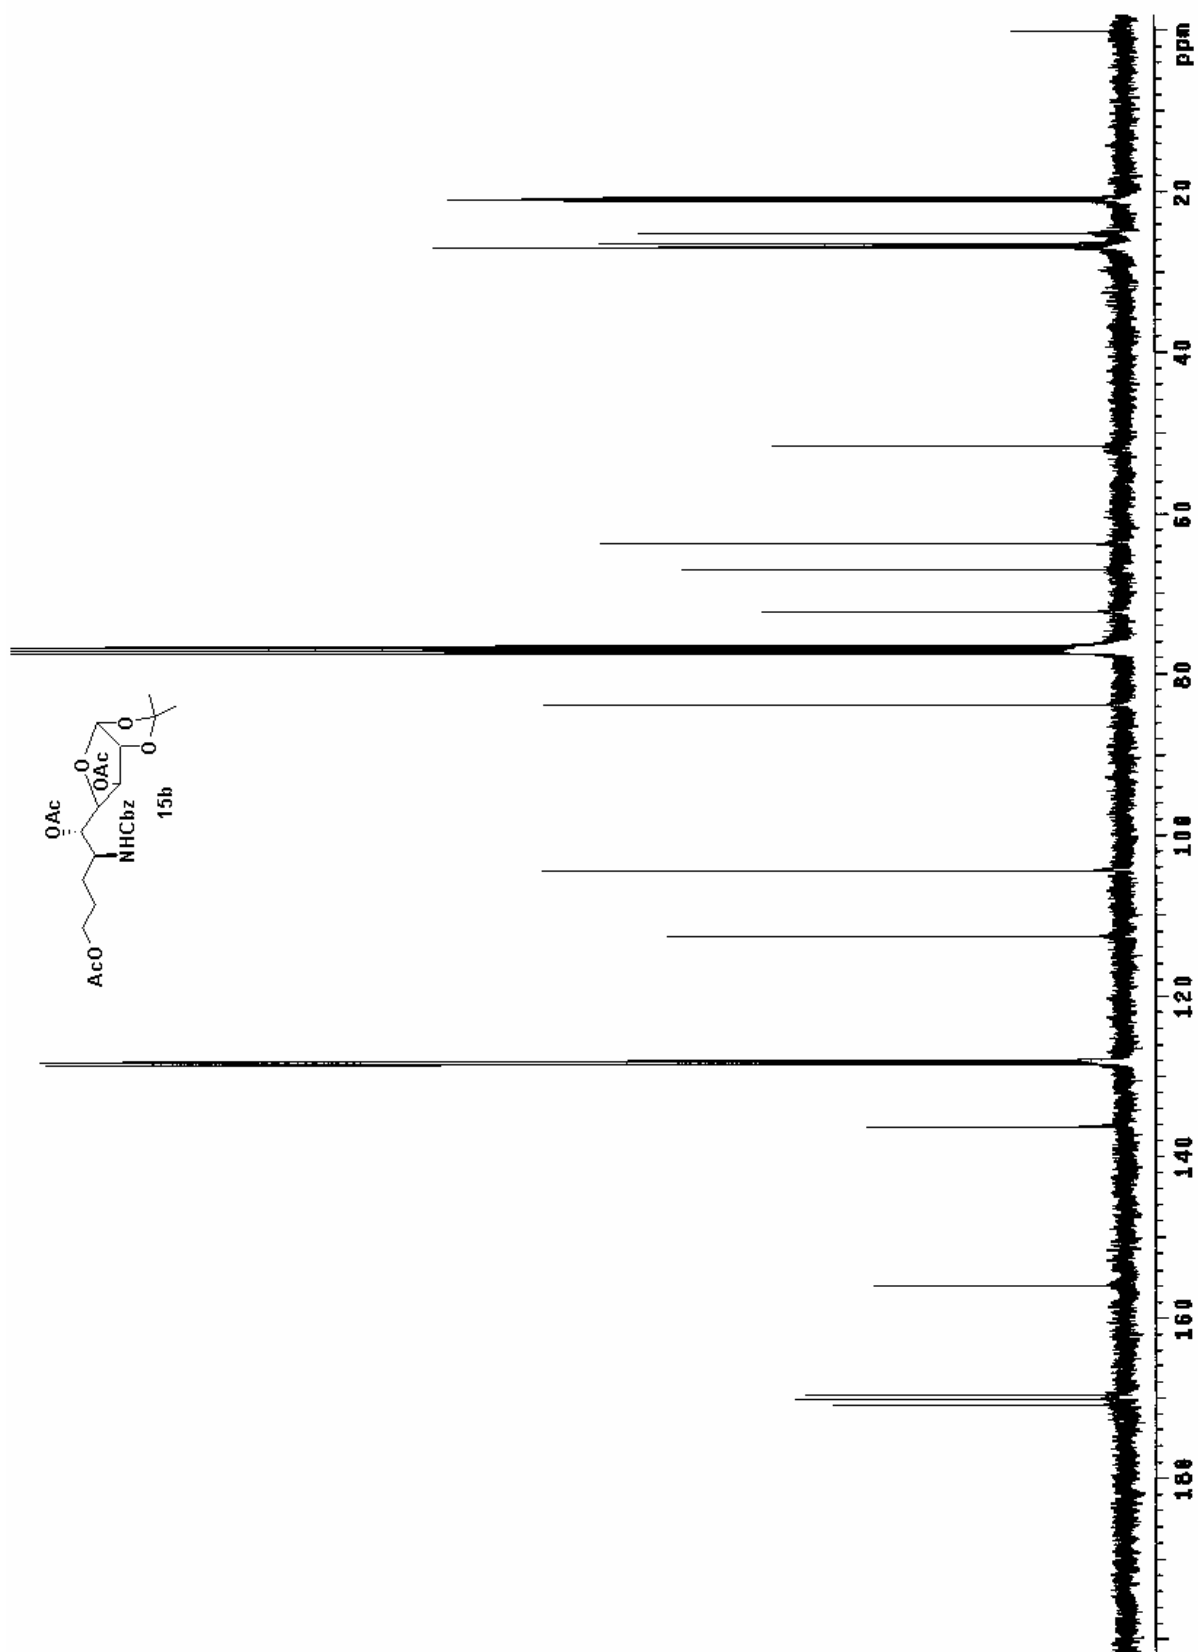

Figure 26:  $^{13}\text{C}$  NMR (75 MHz,  $\text{CDCl}_3$ ) spectrum of compound 15b

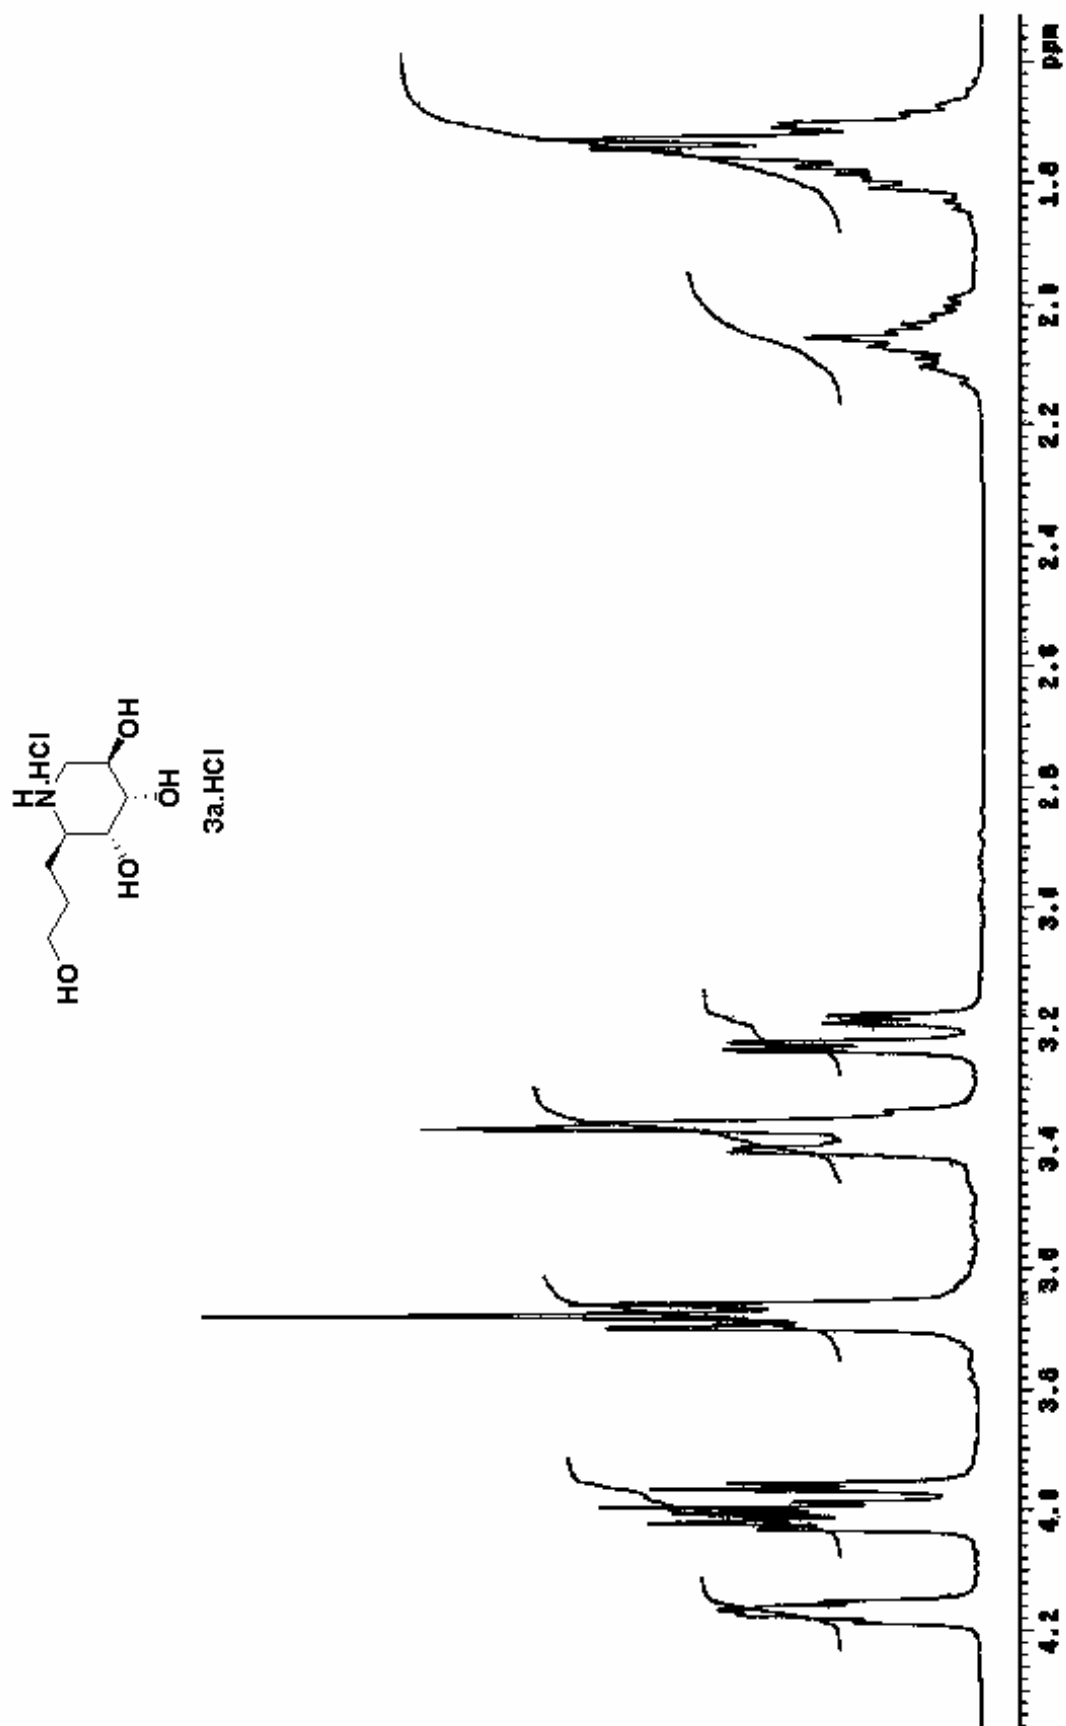

Figure 27:  $^1\text{H}$  NMR (300 MHz, D<sub>2</sub>O) spectrum of compound 3a.HCl

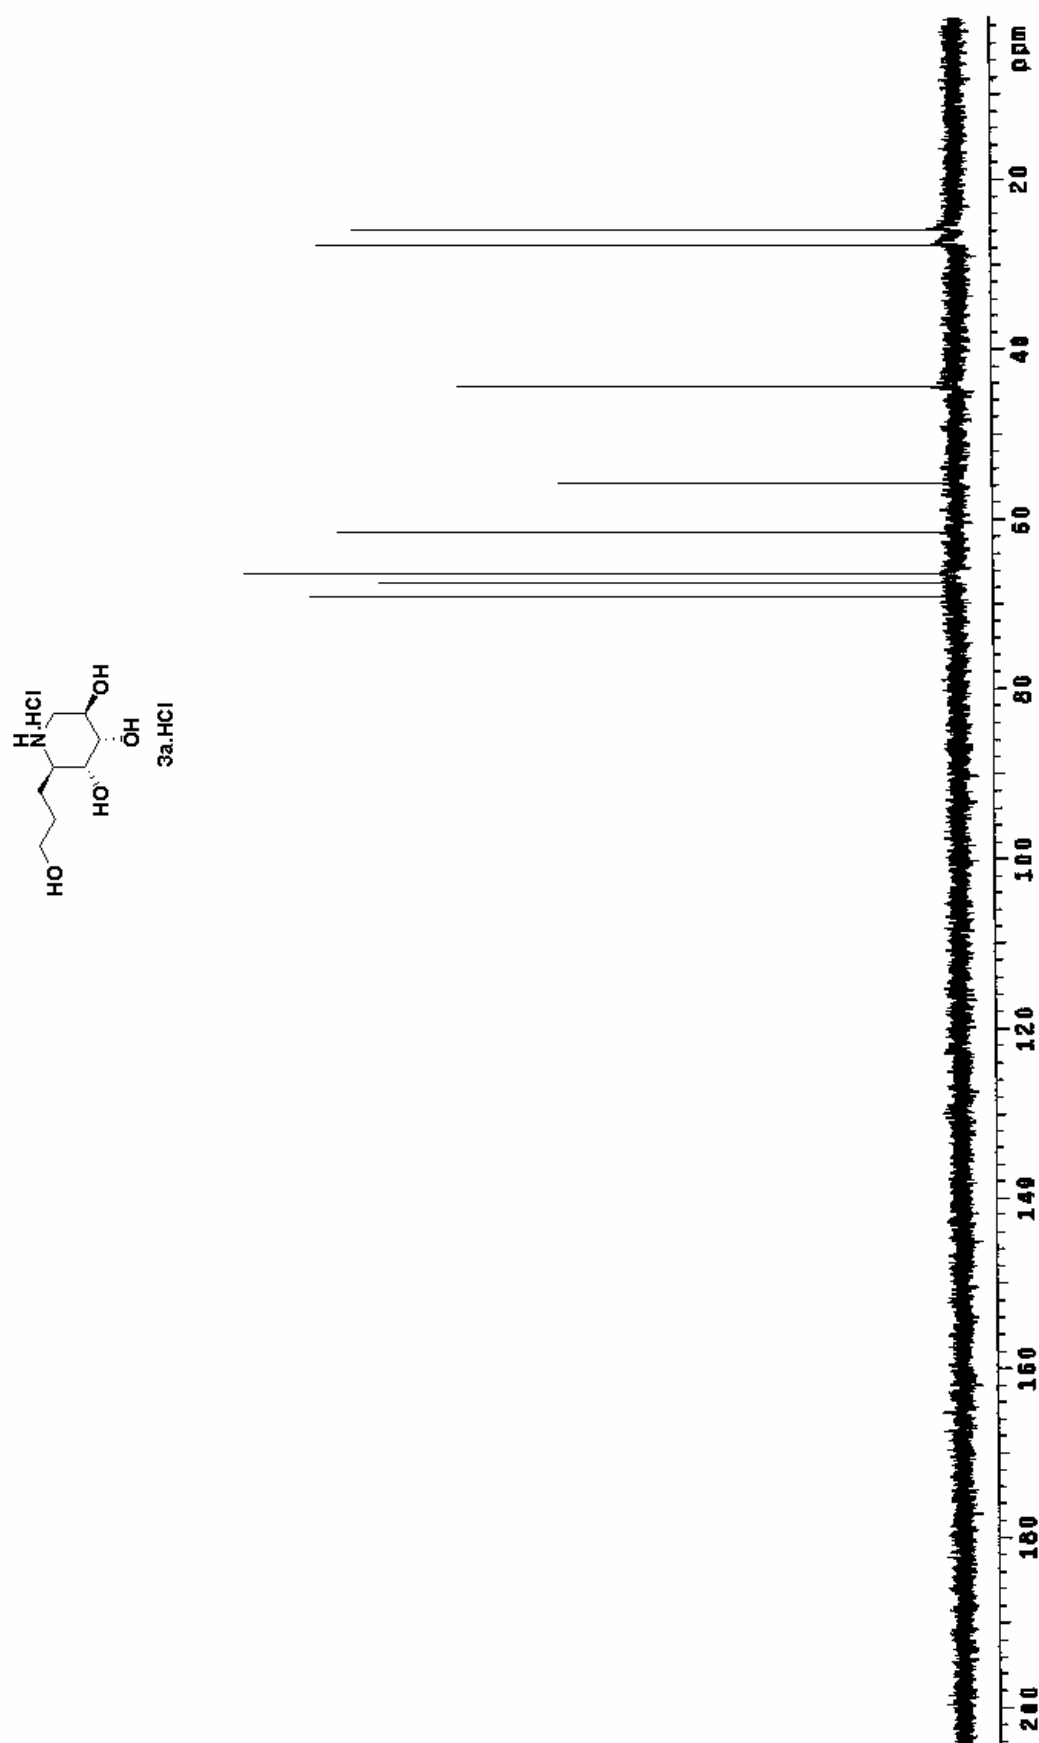

Figure 28:  $^{13}\text{C}$  NMR (75 MHz,  $\text{D}_2\text{O}$ ) spectrum of compound 3a.HCl

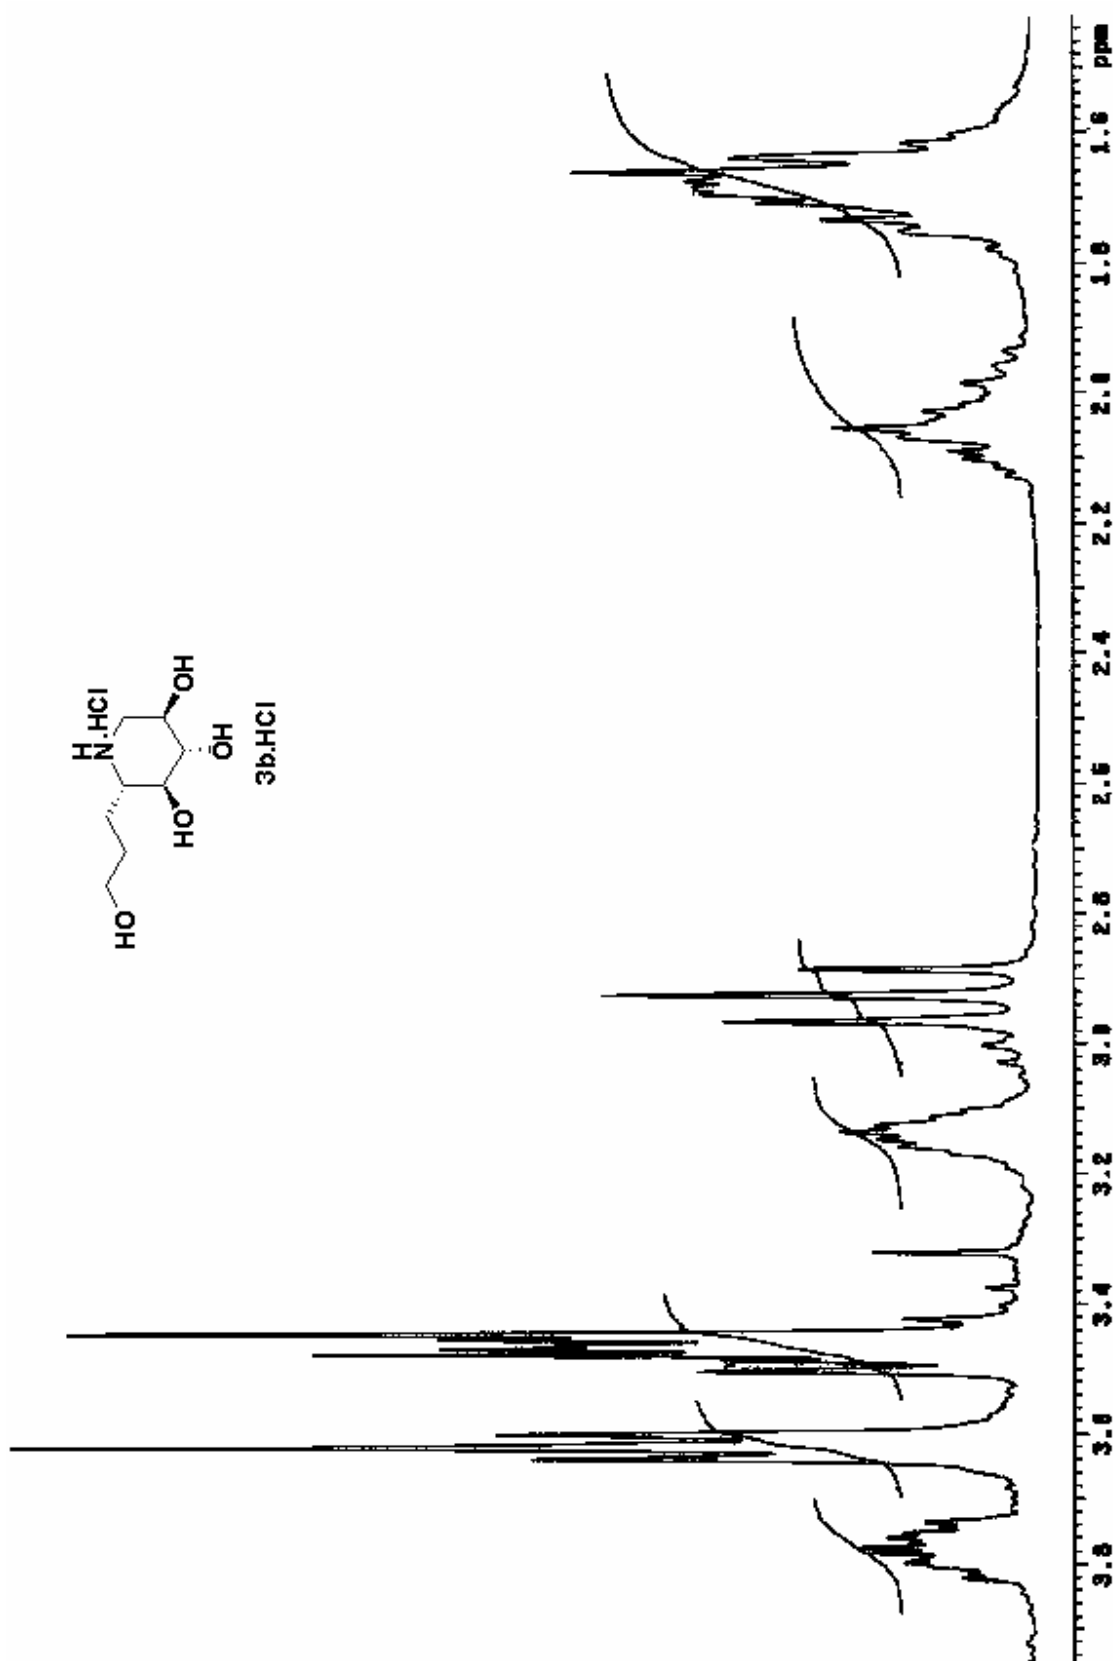

Figure 29: <sup>1</sup>H NMR (300 MHz, D<sub>2</sub>O) spectrum of compound 3b.HCl

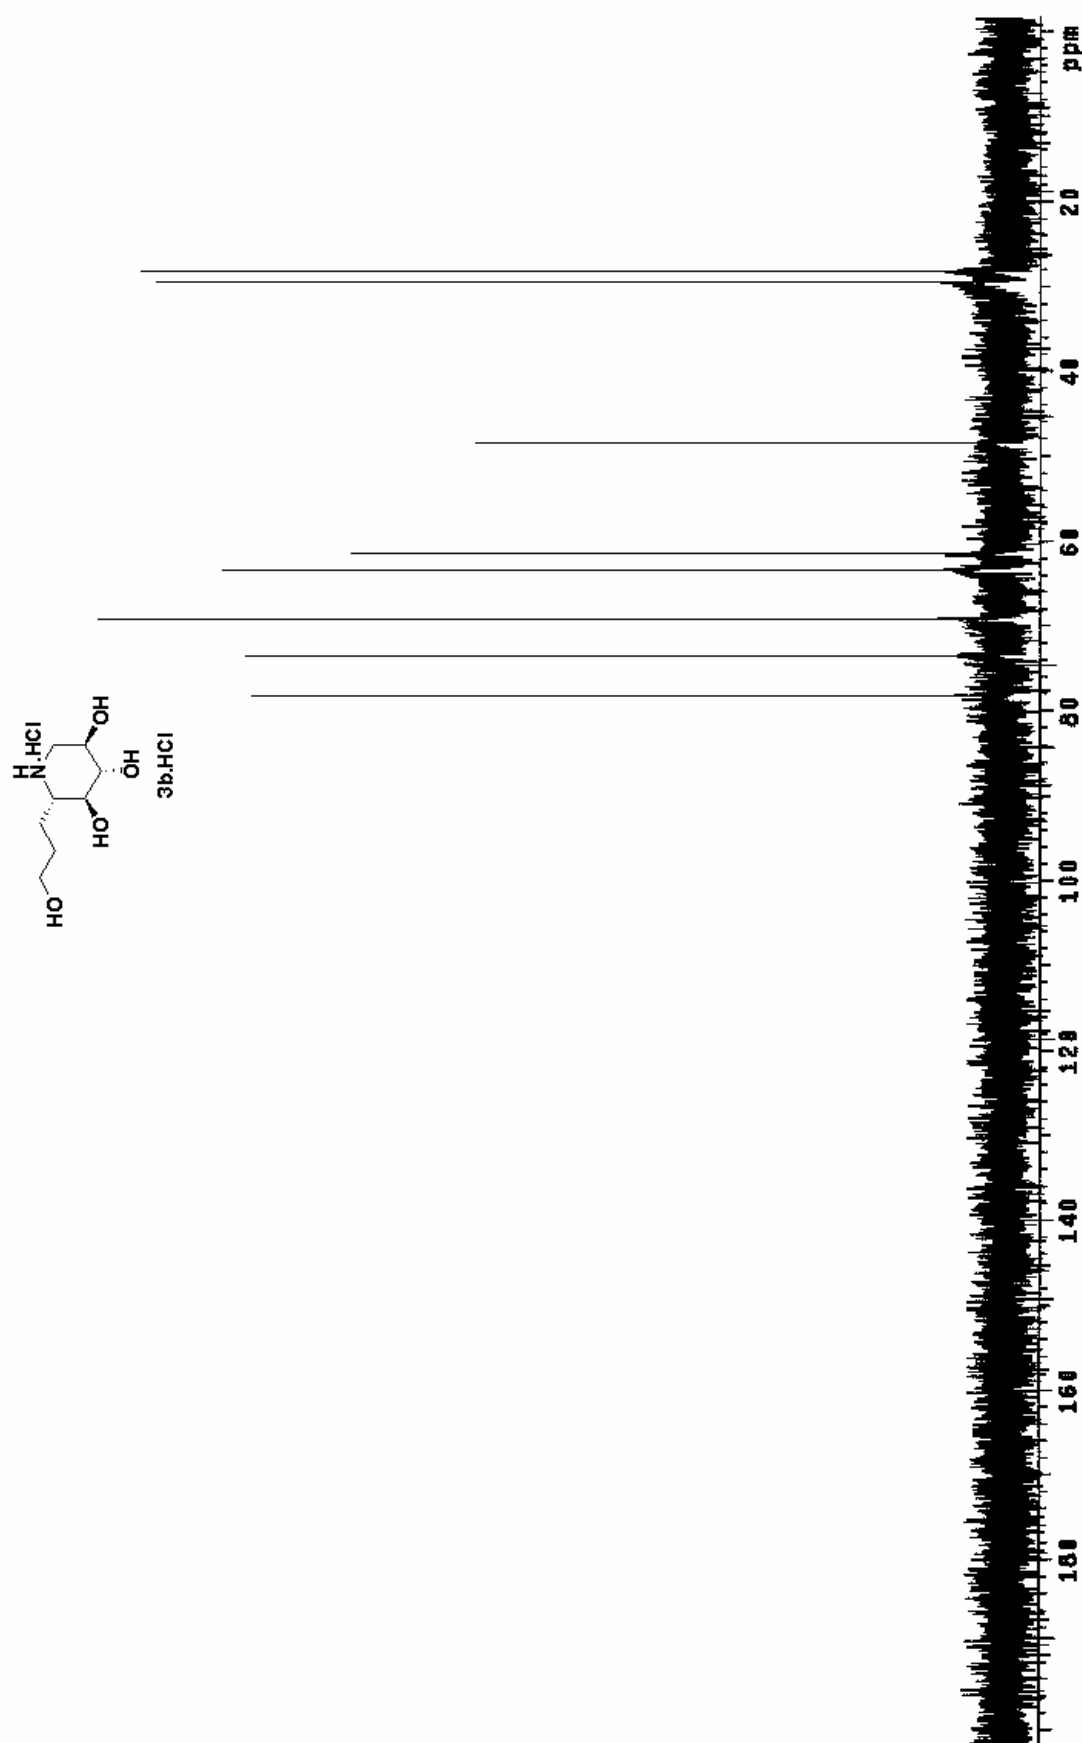

Figure 30:  $^{13}\text{C}$  NMR (75 MHz,  $\text{D}_2\text{O}$ ) spectrum of compound 3b.HCl

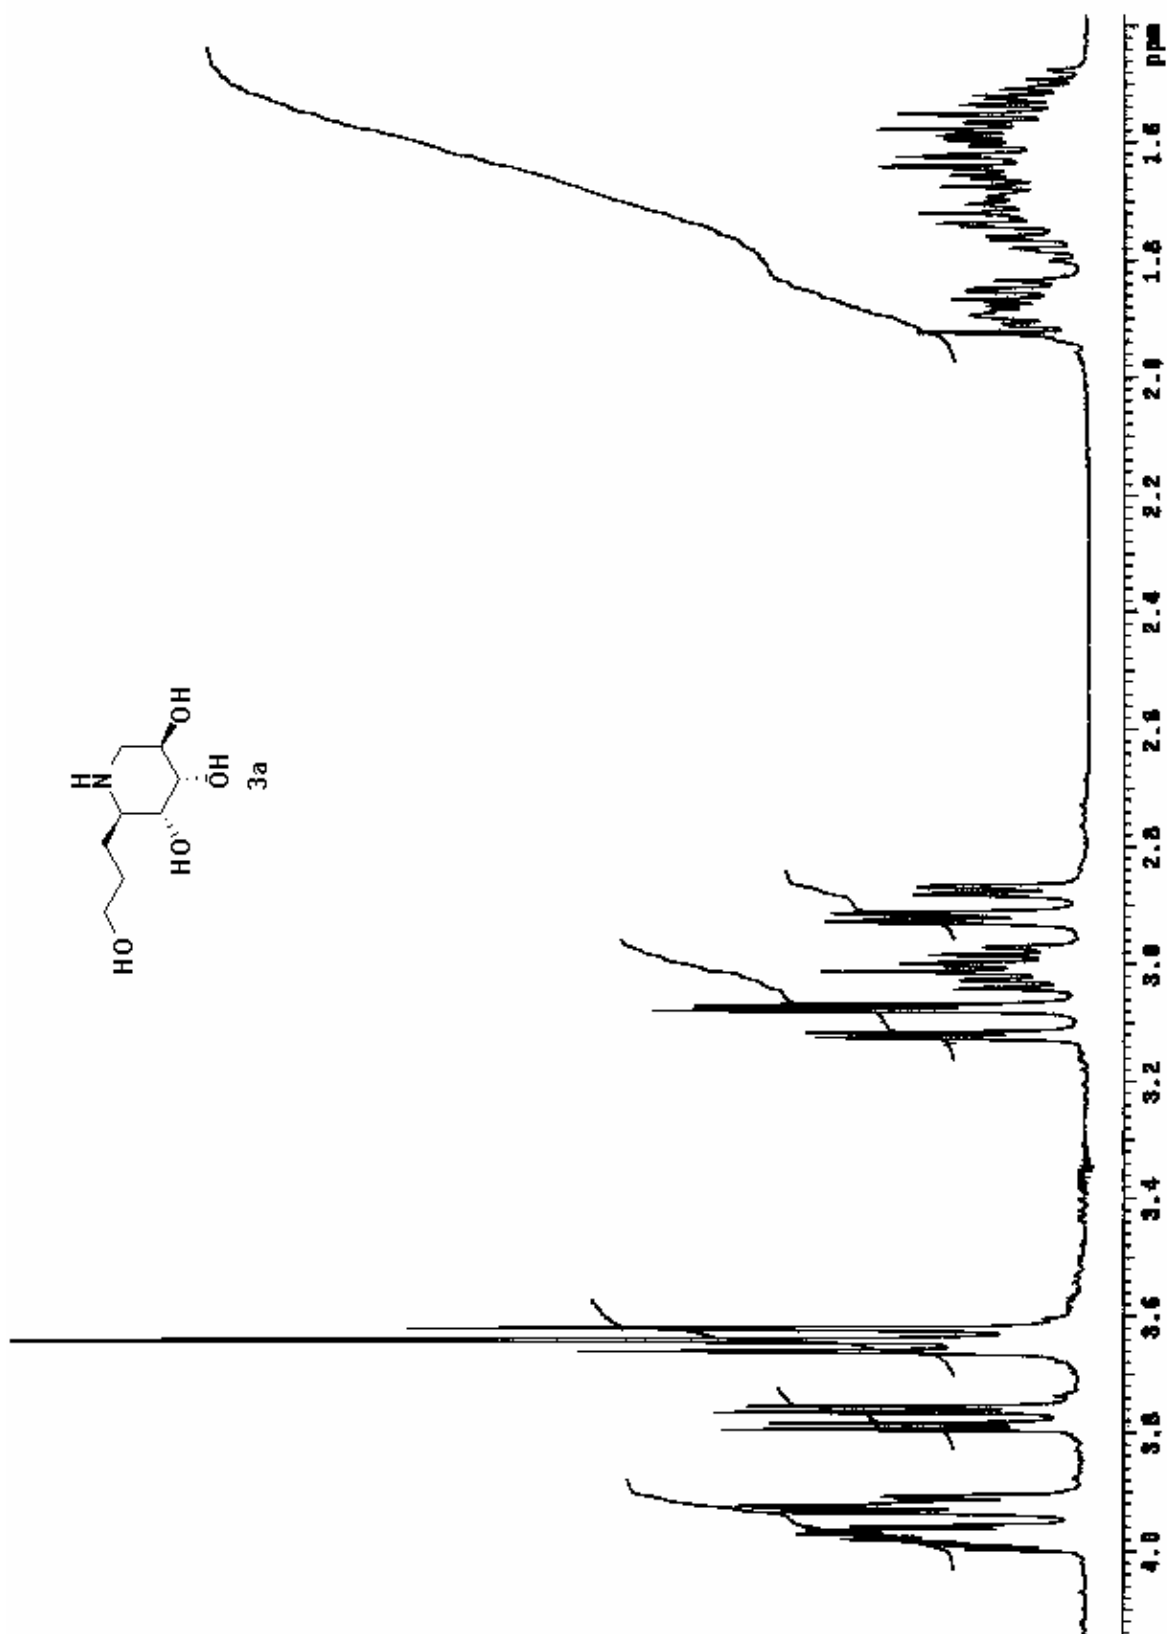

Figure 31: <sup>1</sup>H NMR (300 MHz, D<sub>2</sub>O) spectrum of compound 3a

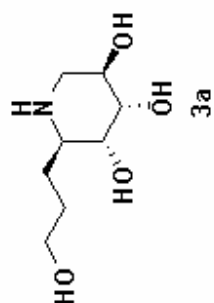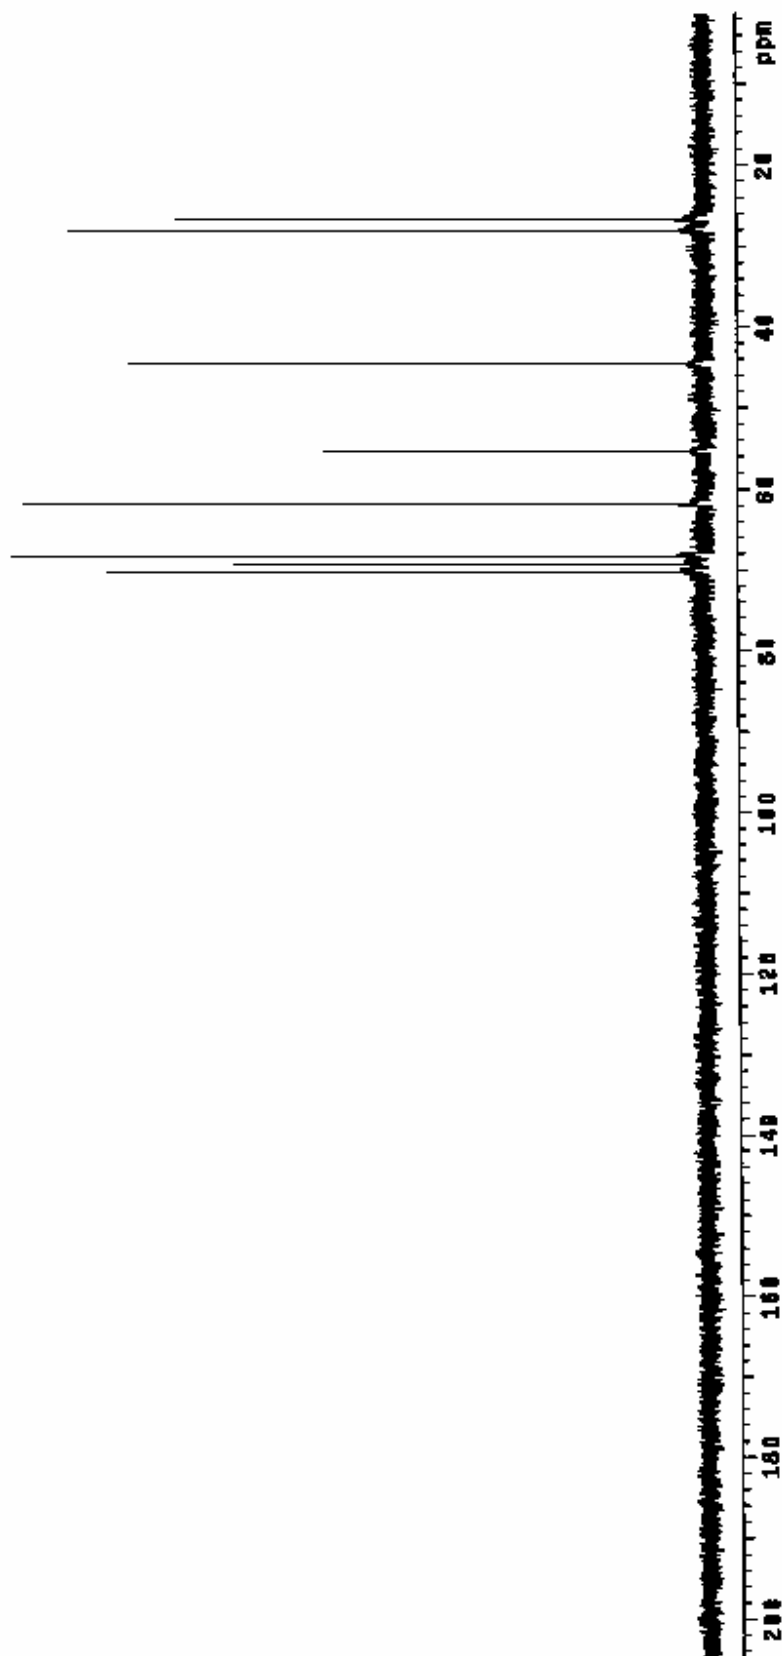

Figure 32:  $^{13}\text{C}$  NMR (75 MHz,  $\text{D}_2\text{O}$ ) spectrum of compound 3a

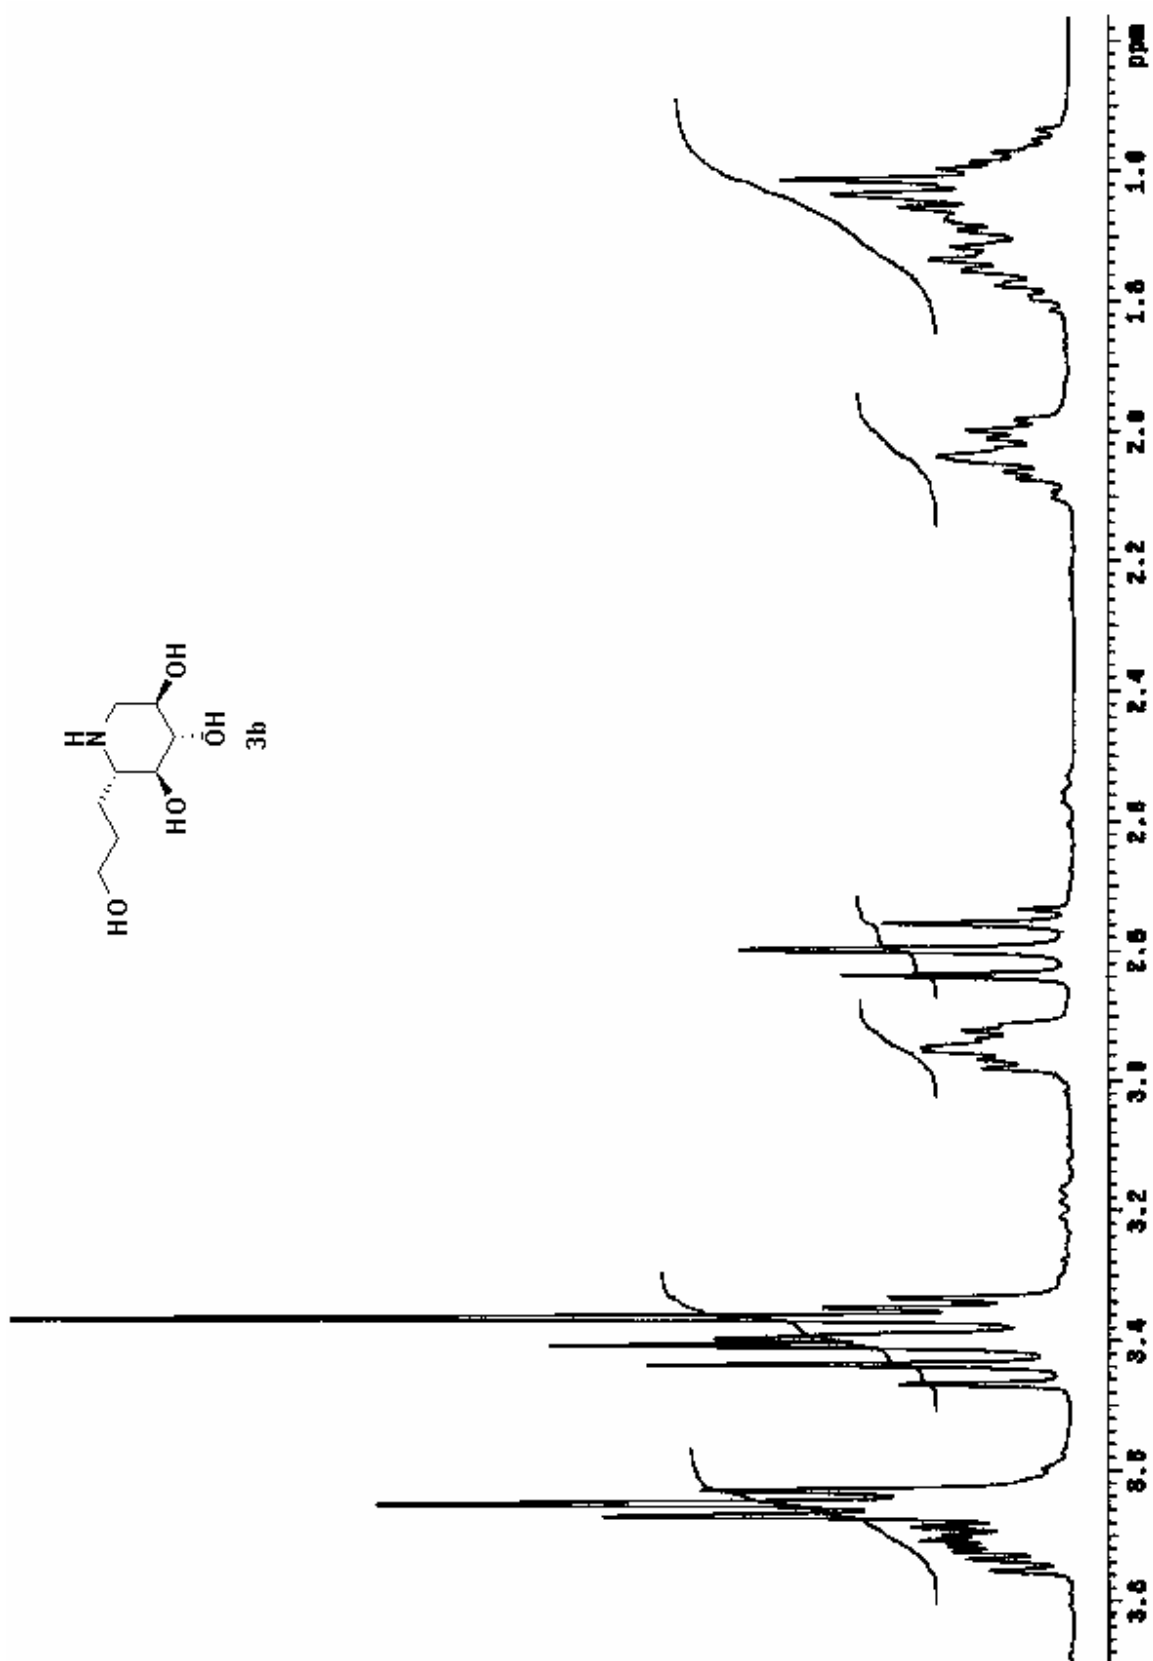

Figure 33: <sup>1</sup>H NMR (300 MHz, D<sub>2</sub>O) spectrum of compound 3b



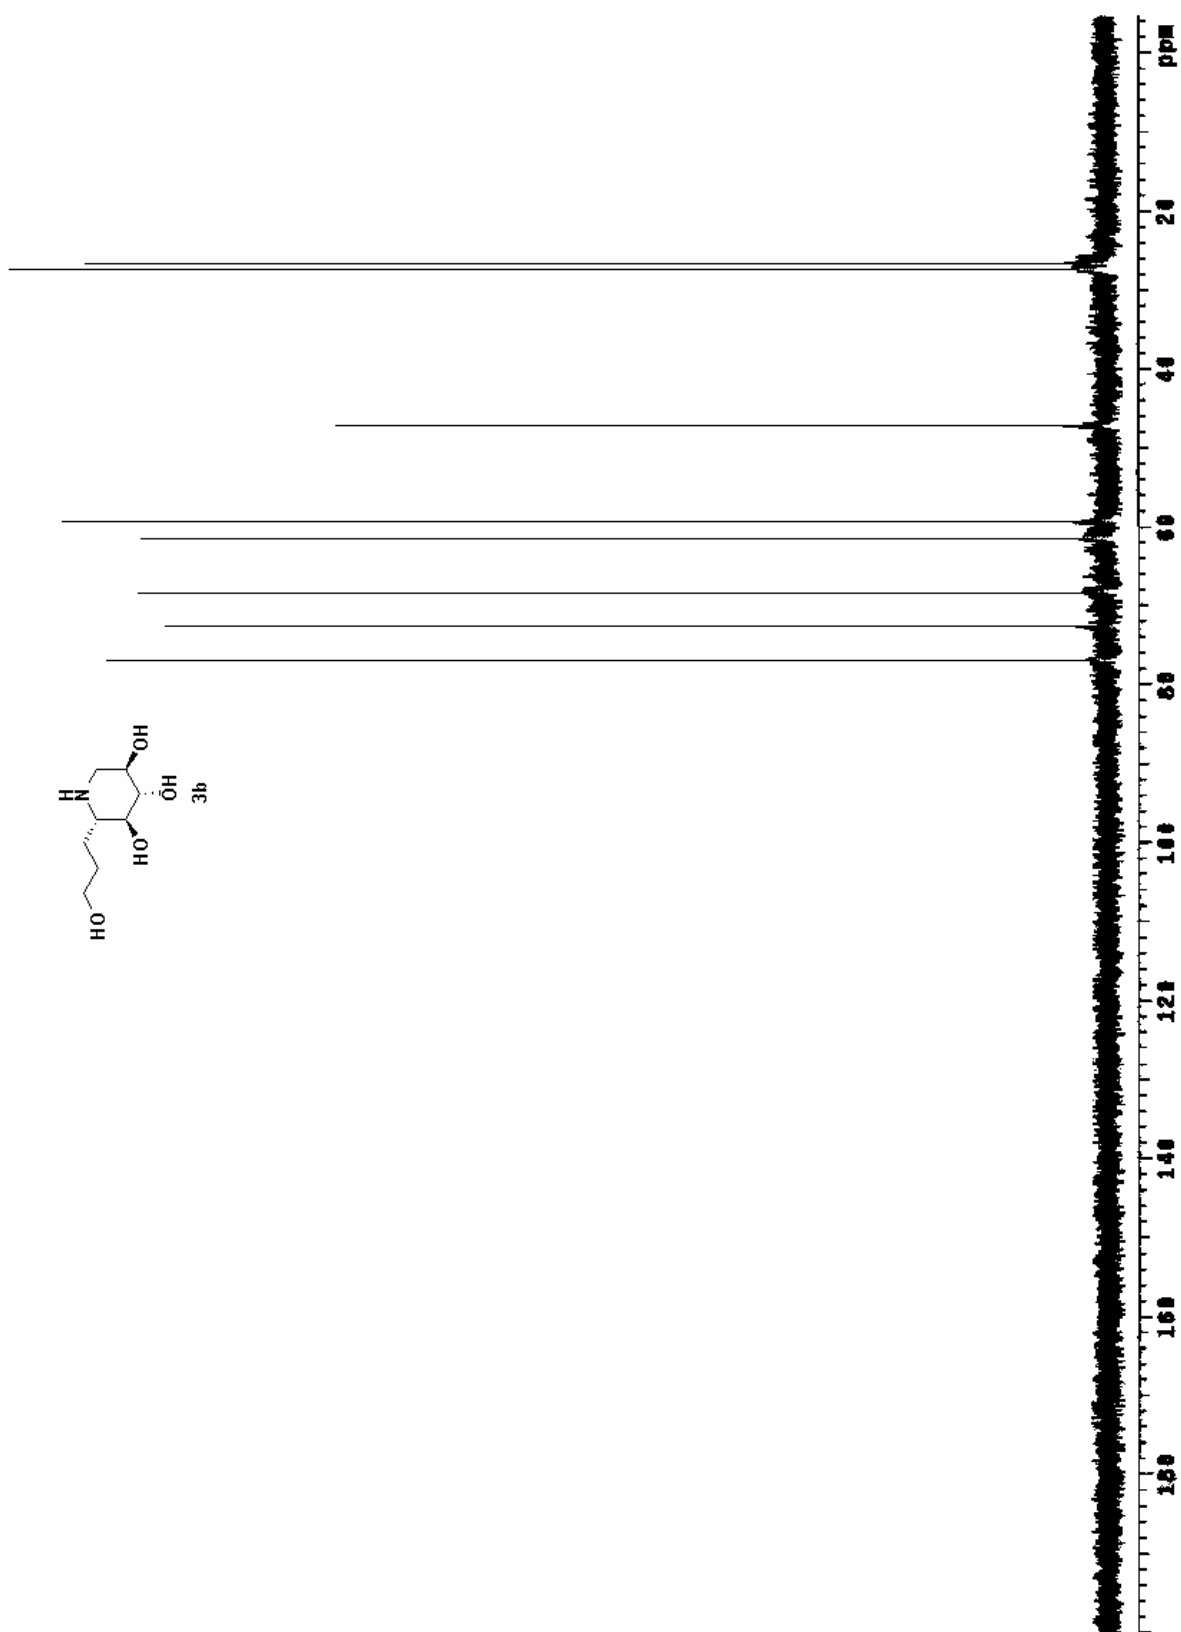

Figure 34: <sup>13</sup>C NMR (75 MHz, D<sub>2</sub>O) spectrum of compound 3b
